# Supplementary material
Source: PubMed Central journal article supplement (PMC6842547)
Supplement: 13321_2019_390_MOESM1_ESM.pdf [file 13321_2019_390_MOESM1_ESM.pdf]

## Identifying new topoisomerase II poison scaffolds by combining publicly available toxicity data and 2D/3D-based virtual screening – Additional Information

Anna Lovrics<sup>1</sup>, Veronika F.S. Pape<sup>1,2</sup>, Dániel Szisz<sup>3</sup>, Adrián Kalászi<sup>3</sup>, Petra Heffeter<sup>4</sup>, Csaba Magyar<sup>1</sup>, Gergely Szakács<sup>1,4\*</sup>

**1** Institute of Enzymology, Research Centre for Natural Sciences, Hungarian Academy of Sciences, H-1117, Budapest, Hungary.

**2** Current Address: Department of Physiology, Semmelweis University, Faculty of Medicine, H-1094 Budapest, Hungary

**3** ChemAxon Ltd., Graphisoft park, Záhony u. 7, H-1031 Budapest, Hungary

**4** Institute of Cancer Research and Comprehensive Cancer Center, Medical University of Vienna, Borschkegasse 8a, A-1090, Vienna, Austria.

\* szakacs.gergely@ttk.mta.hu

## Contents

|                                      |                    |
|--------------------------------------|--------------------|
| <a href="#">1 Additional Text</a>    | <a href="#">3</a>  |
| <a href="#">2 Additional Figures</a> | <a href="#">4</a>  |
| <a href="#">3 Additional Tables</a>  | <a href="#">10</a> |

## 1 Additional Text

Commands used for ROCS (OpenEye Scientific Software, Santa Fe, NM) similarity calculations:

1) generate 3D conformers using OMEGA: `omega2 -mpi_np <n> -in <input> -out <output> -prefix <P> -strictstereo false`

n: number of processors n in MPI mode

input: the input sd file

output: the file containing the 3D conformers, used as input when running ROCS

strictstereo false: when stereocenters are not defined, random stereocenters are defined during the conformer generation

2) run ROCS to compare the structures: `rocs -mpi_np <n> -query <qfile> -dbase <dfile> mcquery true -rankby TanimotoCombo -stats best -subrocs -scoreonly`

n: number of processors n in MPI mode

mcquery: combine contiguous conformers in the query file into a multi-conformer query molecule

qfile: file containing the query molecule dfile: file containing the molecules to overlay against query

rankby ShapeTanimoto: rank molecular overlay by shape and color

stats best: the report includes stats for the best overlay(s) for every dbase molecule

subrocs: start the search at all heavy atoms of the larger molecule as well as the default inertial starts

scoreonly: perform scoring calculation only

Commands used for CFP (ChemAxon Ltd., Budapest, Hungary) similarity calculations:

`screenmd <target.sdf> <query.sdf> -k CF -c <cfp.xml> -M Tanimoto -e 2 -o <output.txt>`

target.sdf: sd file containing the target molecule(s)

query.sdf: sd file containing the query molecule(s)

-k CF: use the CFP descriptor

cfp.xml: the config file used, the cfp.xml available from `jchem16.7/examples/config`, where the Tanimoto threshold was set to 1.0, in order to report all similarity values

-M Tanimoto: use the metric Tanimoto as specified in the config file

-e 2: two decimal places after the decimal point

output.txt: the name of the output file

## 2 Additional Figures

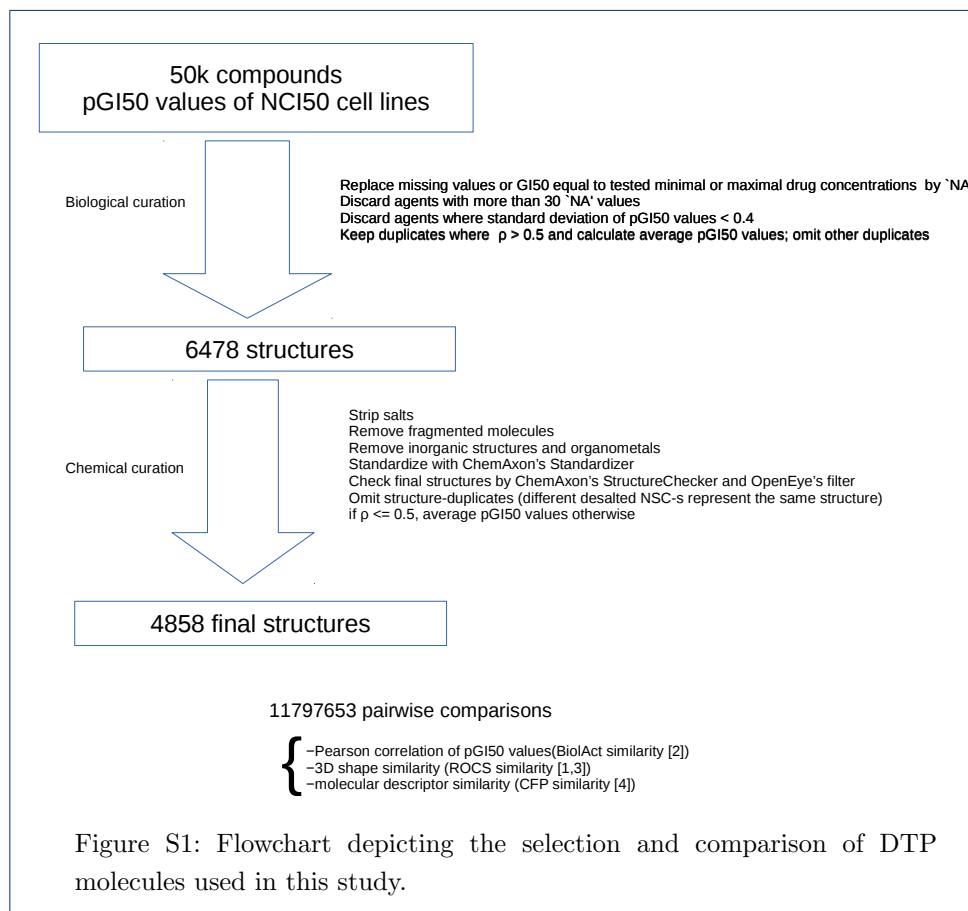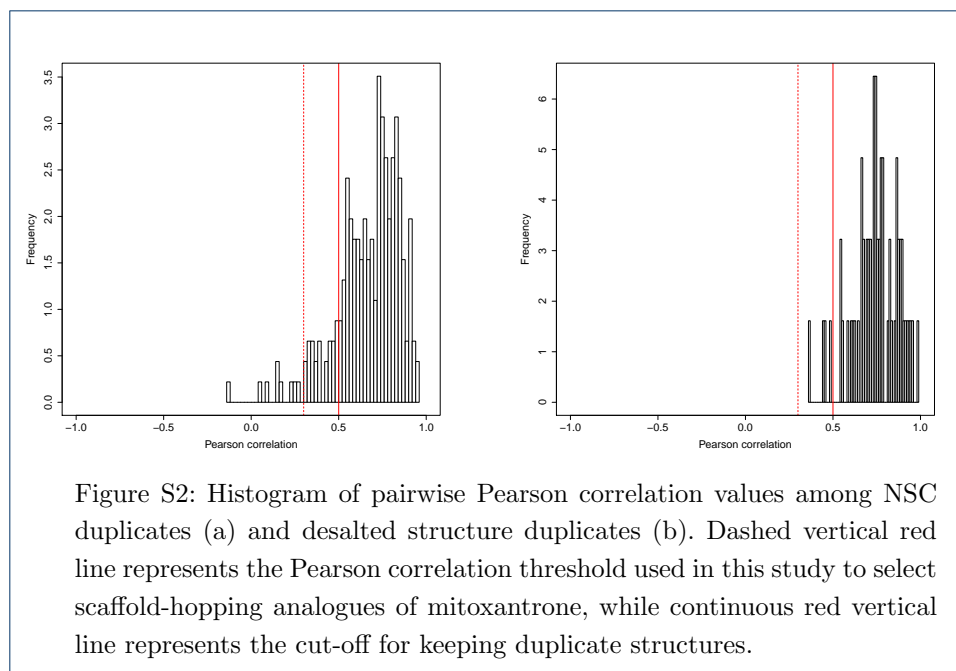

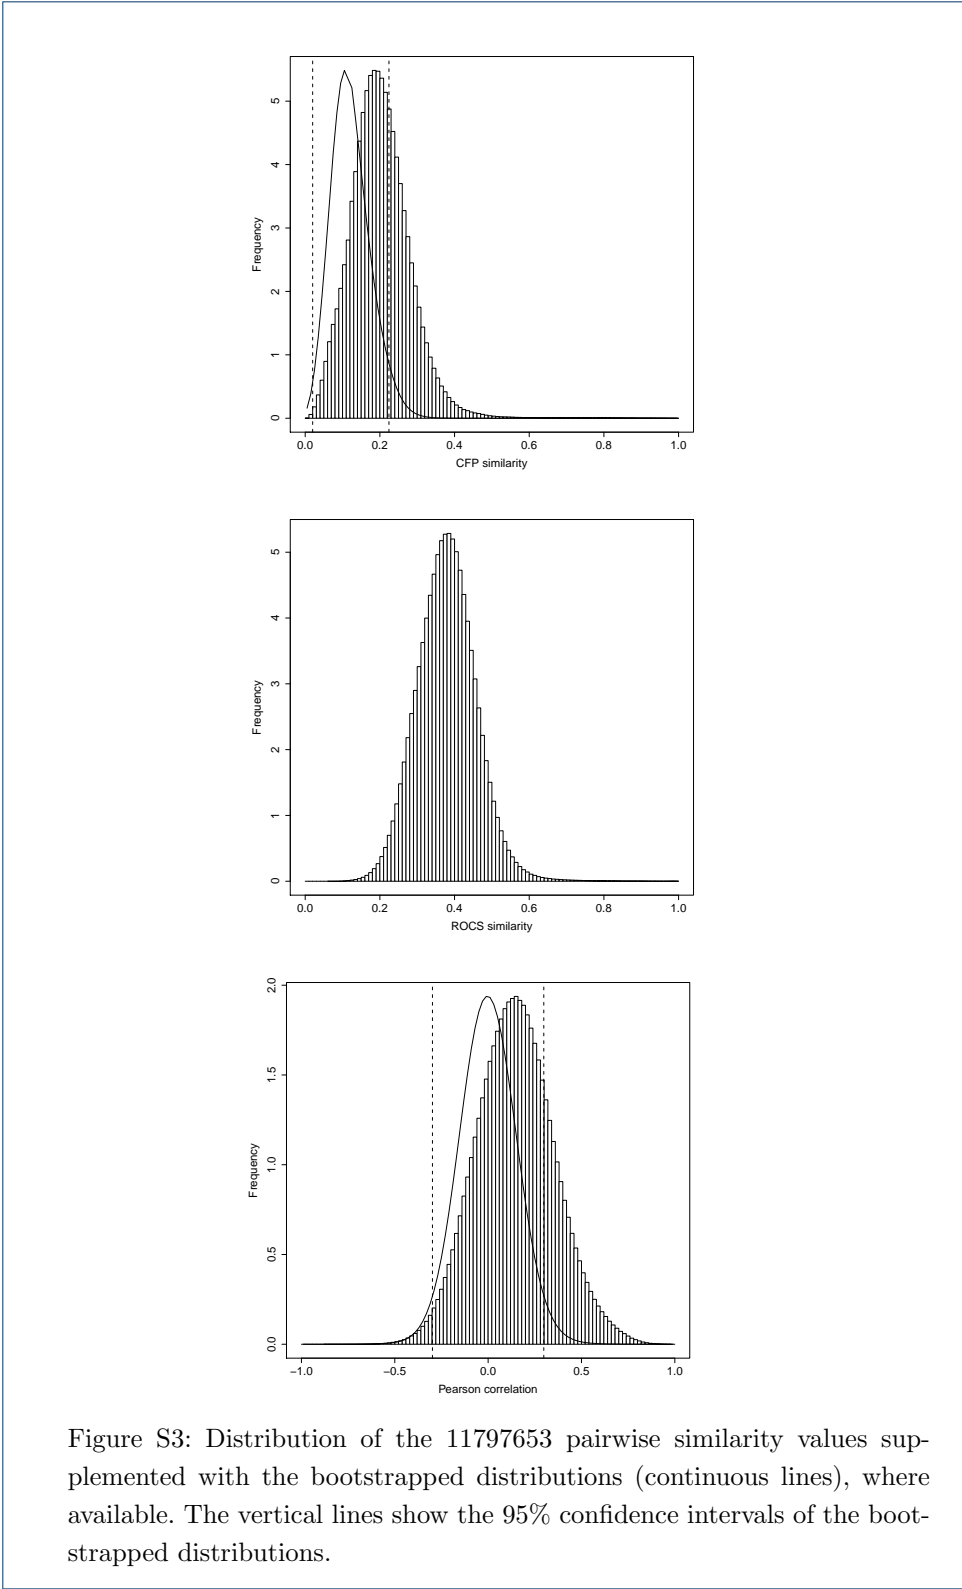

Figure S3: Distribution of the 11797653 pairwise similarity values supplemented with the bootstrapped distributions (continuous lines), where available. The vertical lines show the 95% confidence intervals of the bootstrapped distributions.

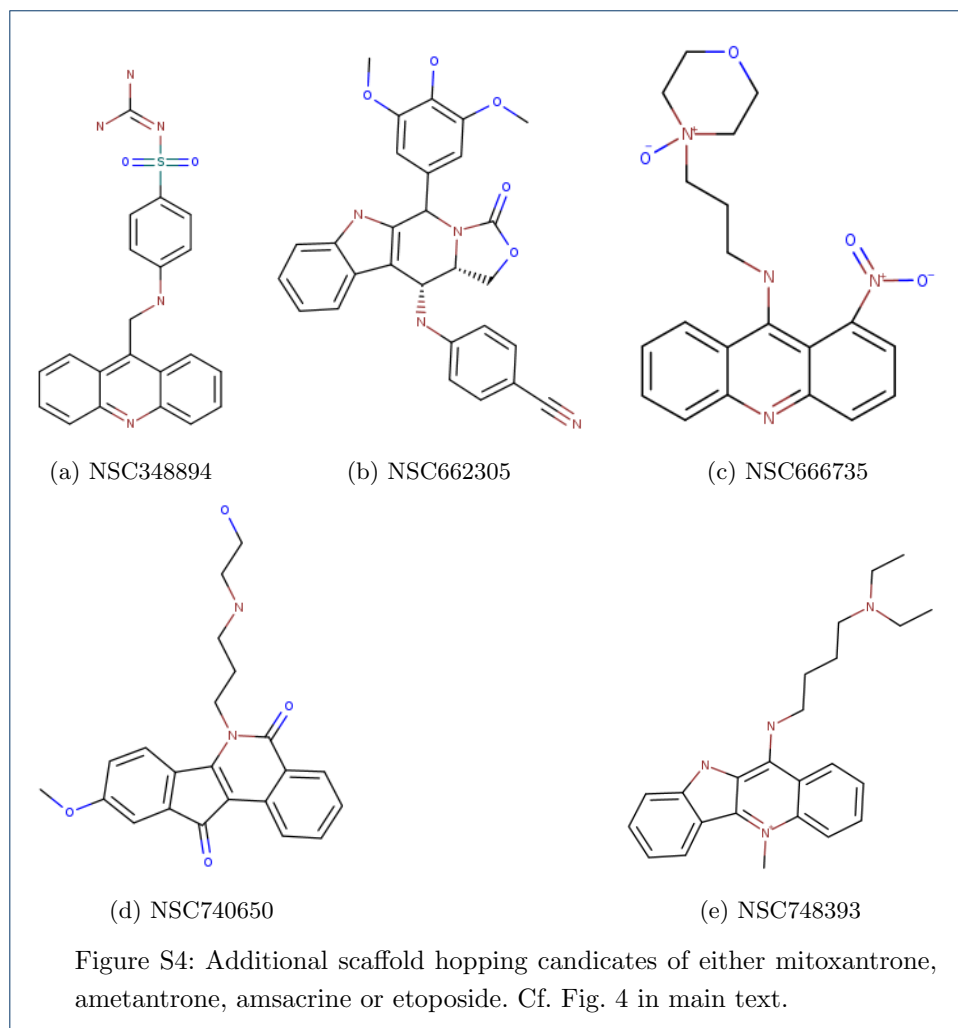

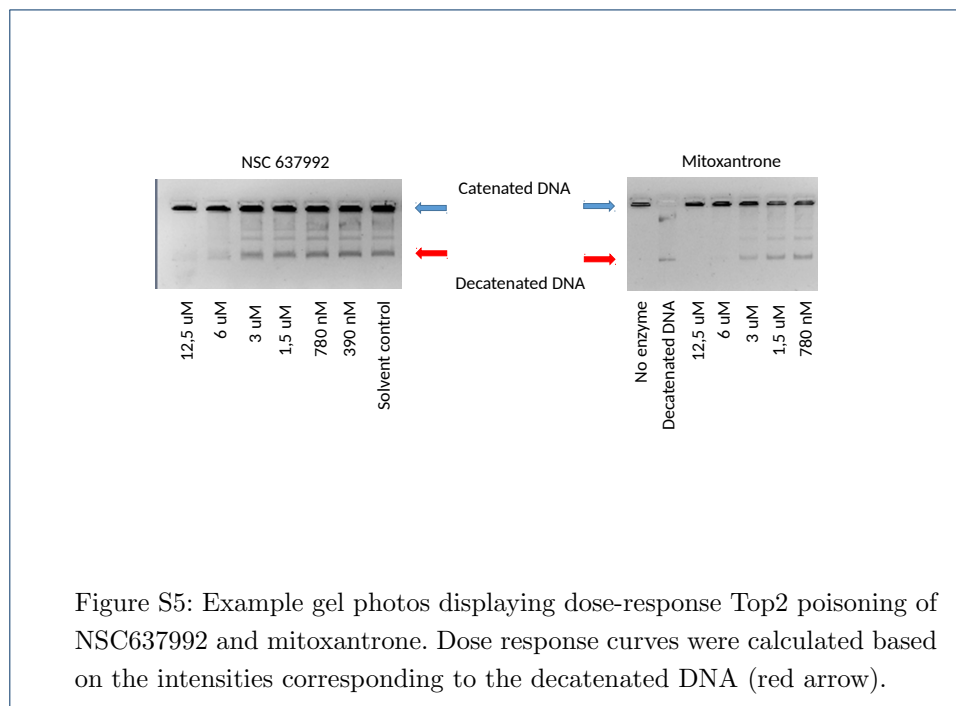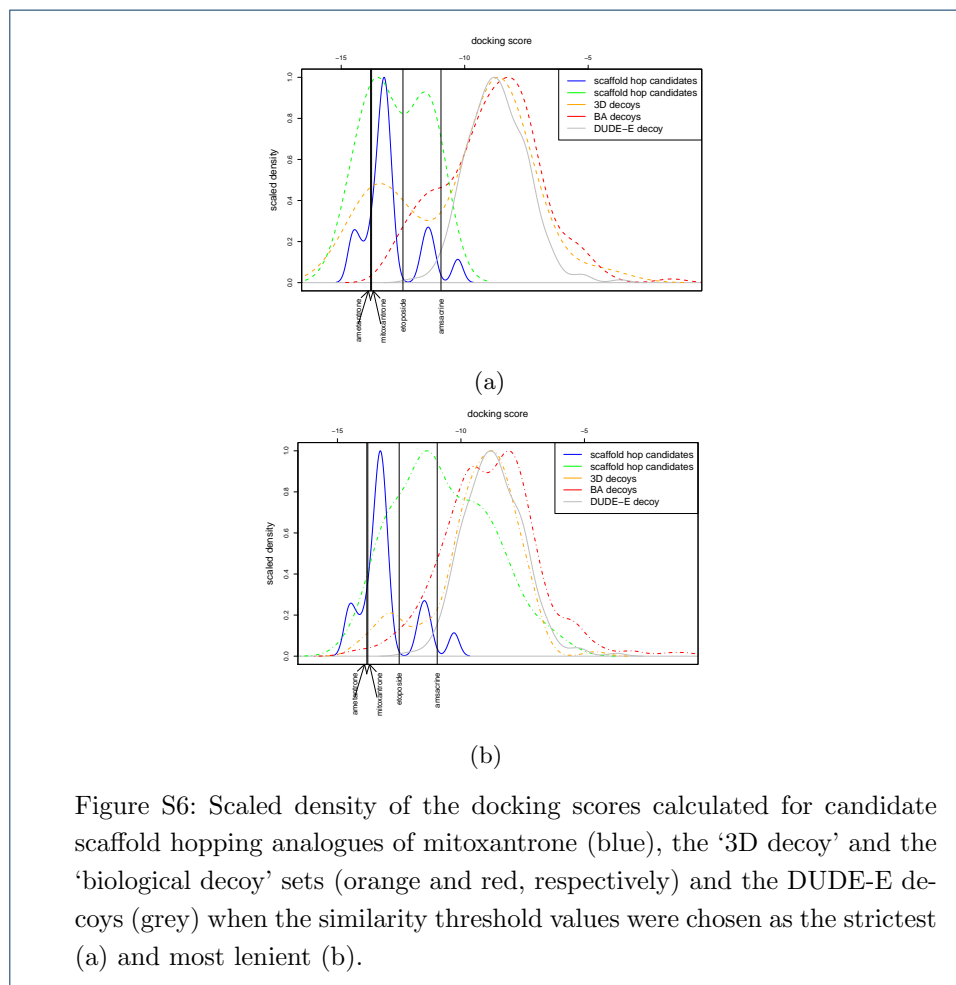

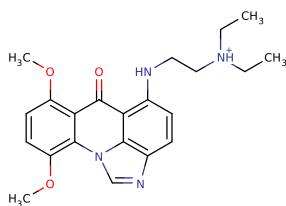

Figure S7: NSC660839, the '3D decoy' molecule tested in the *in vitro* decatenation assay.

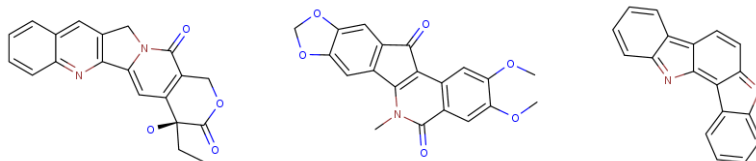

Figure S8: Known Top1 inhibitor scaffolds: camptothecins (NSC94600), indenoisoquinolines (NSC314622), indolocarbazoles.

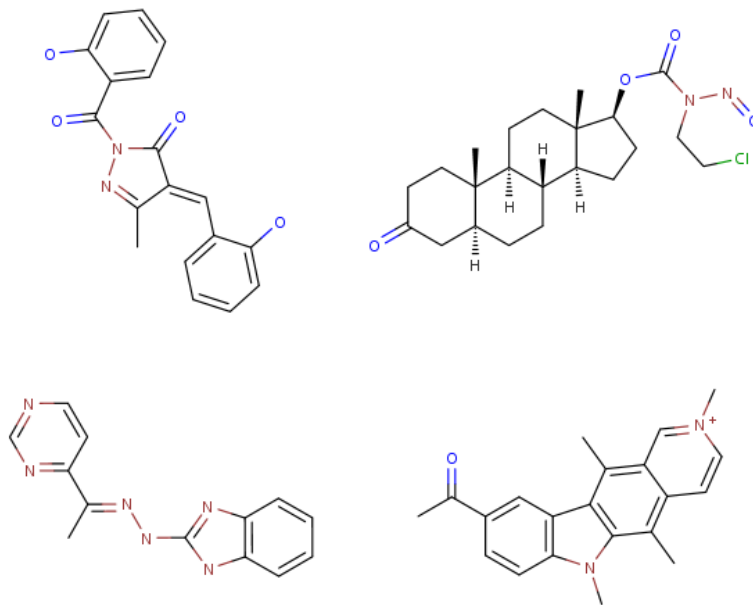

Figure S9: Scaffold hopping candidates of camptothecin obtained using threshold values  $BA > 0.49$ ,  $ROCS > 0.51$ ,  $CFP \leq 0.34$ .



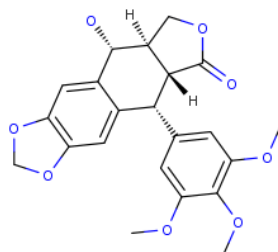

Figure S10: NSC24818 (podofilox).

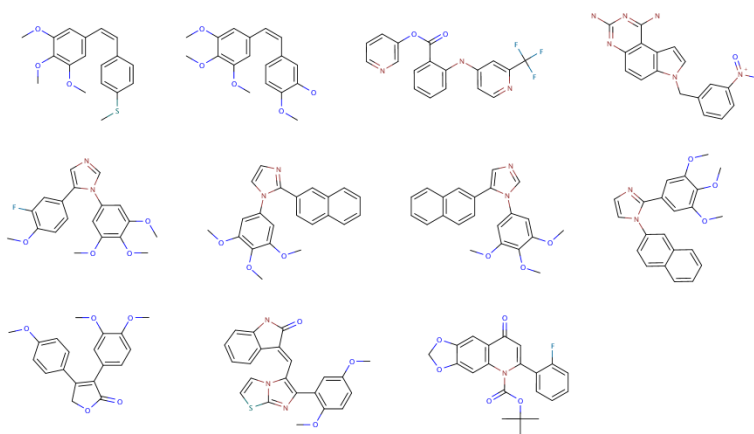Figure S11: Scaffold hopping candidates of NSC24818 obtained using threshold values  $BA > 0.41$ ,  $ROCS > 0.48$ ,  $CFP \leq 0.30$ .

### 3 Additional Tables

Table S1: Pearson correlation (BiolAct similarity) of the pIC50 values of annotated Top2 poisons to mitoxantrone.

| name                                  | NSC    | BiolAct |
|---------------------------------------|--------|---------|
| ametantrone                           | 196473 | 0.80    |
| daunorubicin                          | 83142  | 0.70    |
| idarubicin                            | 256439 | 0.72    |
| N,N-dibenzyl Daunorubicin             | 268242 | 0.43    |
| epirubicin                            | 256942 | 0.65    |
| doxorubicin                           | 123127 | 0.80    |
| rubidazon                             | 164011 | 0.83    |
| valrubicin                            | 246131 | 0.79    |
| menogaril                             | 269148 | 0.85    |
| piroxastrone                          | 349174 | 0.89    |
| bisantrene                            | 337766 | 0.61    |
| amsacrine                             | 249992 | 0.87    |
| 2-methyllellipticinium                | 351710 | 0.44    |
| 2-N-Methyl-6-thiaellipticinium iodide | 638066 | 0.59    |
| etoposide                             | 141540 | 0.66    |
| teniposide                            | 122819 | 0.86    |
| dexrazoxane                           | 169780 | 0.57    |

Table S2: Selected similarity thresholds to identify putative scaffold hopping analogues of mitoxantrone.

| metric | threshold |
|--------|-----------|
| BA     | 0.55      |
| CFP    | 0.32      |
| ROCS   | 0.51      |

Table S3: Docking scores and rankings (from 1173 compounds) of mitoxantrone and its scaffold hopping candidates.

| chemotype                                       | NSC    | docking | rank |
|-------------------------------------------------|--------|---------|------|
| mitoxantrone                                    | 301739 | -13.138 | 38   |
| lucanthone derivatives                          | 317003 | -11.307 | 208  |
|                                                 | 317921 | -11.474 | 187  |
|                                                 | 334352 | -11.672 | 154  |
| triazoloacridinones                             | 645829 | -13.412 | 24   |
|                                                 | 699148 | -10.28  | 348  |
| pyrimidoacridines                               | 693117 | -13.187 | 37   |
|                                                 | 693118 | -14.476 | 2    |
|                                                 | 693119 | -13.533 | 18   |
|                                                 | 693120 | -14.573 | 1    |
|                                                 | 691849 | -13.812 | 12   |
| sedoxantrone                                    | 691852 | -14.172 | 7    |
|                                                 | 635371 | -13.322 | 32   |
| imidazoacridinones                              | 637991 | -13.66  | 15   |
|                                                 | 637992 | -13.254 | 35   |
|                                                 | 637994 | -13.254 | 34   |
|                                                 | 645808 | -13.326 | 31   |
|                                                 | 645809 | -13.004 | 47   |
|                                                 | 645810 | -13.269 | 33   |
| 5-substituted-9-aminoacridine<br>4 carboxamides | 691240 | -13.083 | 39   |
|                                                 | 693545 | -12.952 | 52   |

Table S4: Maximum of biological, ROCS and 2D similarities compared to mitoxantrone, ametantrone, amsacrine or etoposide. Additionally, docking scores of these compounds.

| NSC    | BiolAct | ROCS | CFP  | docking |
|--------|---------|------|------|---------|
| 348894 | 0.87    | 0.6  | 0.34 | -11.23  |
| 662305 | 0.75    | 0.53 | 0.37 | -12.72  |
| 666735 | 0.56    | 0.55 | 0.33 | -9.47   |
| 740650 | 0.68    | 0.54 | 0.33 | -13.00  |
| 748393 | 0.58    | 0.53 | 0.31 | -12.12  |

Table S5: Similarities compared to published Top2 ligands and docking scores of 3D decoy agents.

| NSC    | lead         | BiolAct | ROCS | CFP  | docking |
|--------|--------------|---------|------|------|---------|
| 69600  | amsacrine    | 0.07    | 0.54 | 0.32 | -7.93   |
| 87034  | amsacrine    | 0.10    | 0.57 | 0.28 | -8.30   |
| 131734 | amsacrine    | 0.43    | 0.59 | 0.32 | -9.38   |
| 175636 | amsacrine    | 0.43    | 0.54 | 0.18 | -9.82   |
| 175639 | amsacrine    | 0.34    | 0.54 | 0.24 | -9.73   |
| 201873 | amsacrine    | -0.06   | 0.61 | 0.19 | -8.82   |
| 208652 | mitoxantrone | 0.13    | 0.58 | 0.24 | -6.67   |
| 225112 | mitoxantrone | 0.28    | 0.57 | 0.27 | -7.93   |
| 280594 | amsacrine    | 0.12    | 0.53 | 0.20 | -8.56   |
| 348401 | amsacrine    | 0.36    | 0.57 | 0.21 | -7.12   |
| 348402 | amsacrine    | 0.20    | 0.56 | 0.22 | -7.38   |
| 601518 | amsacrine    | 0.41    | 0.69 | 0.26 | -9.34   |
| 612115 | mitoxantrone | 0.37    | 0.52 | 0.30 | -7.10   |
| 625537 | amsacrine    | 0.16    | 0.53 | 0.19 | -9.59   |
| 627891 | amsacrine    | 0.39    | 0.52 | 0.30 | -8.09   |
| 637729 | amsacrine    | 0.16    | 0.53 | 0.17 | -8.53   |
| 637993 | mitoxantrone | 0.38    | 0.53 | 0.28 | -12.47  |
| 645812 | mitoxantrone | 0.18    | 0.53 | 0.29 | -12.72  |
| 645813 | ametrantrone | 0.31    | 0.54 | 0.22 | -12.97  |
| 645827 | mitoxantrone | 0.36    | 0.56 | 0.26 | -12.74  |
| 645828 | mitoxantrone | 0.41    | 0.56 | 0.26 | -12.30  |
| 645830 | mitoxantrone | 0.48    | 0.55 | 0.24 | -12.91  |
| 647751 | ametrantrone | 0.51    | 0.53 | 0.22 | -12.02  |
| 648211 | amsacrine    | -0.03   | 0.52 | 0.25 | -10.26  |
| 652183 | amsacrine    | 0.31    | 0.54 | 0.18 | -7.91   |
| 652884 | amsacrine    | 0.26    | 0.53 | 0.33 | -9.80   |
| 657348 | ametrantrone | 0.20    | 0.59 | 0.24 | -8.90   |
| 659998 | mitoxantrone | 0.14    | 0.54 | 0.31 | -8.21   |
| 659999 | mitoxantrone | 0.14    | 0.52 | 0.32 | -8.37   |
| 660638 | mitoxantrone | 0.23    | 0.53 | 0.33 | -9.70   |
| 660839 | mitoxantrone | 0.13    | 0.61 | 0.28 | -12.76  |
| 660840 | mitoxantrone | 0.19    | 0.61 | 0.27 | -12.86  |
| 660841 | mitoxantrone | 0.39    | 0.55 | 0.29 | -12.51  |
| 664000 | amsacrine    | 0.06    | 0.52 | 0.18 | -8.46   |
| 664878 | amsacrine    | 0.39    | 0.53 | 0.21 | -8.13   |
| 665378 | amsacrine    | 0.19    | 0.59 | 0.23 | -8.66   |
| 665492 | amsacrine    | 0.28    | 0.53 | 0.22 | -9.61   |
| 665700 | amsacrine    | 0.01    | 0.52 | 0.21 | -8.88   |
| 666735 | amsacrine    | 0.29    | 0.55 | 0.33 | -9.46   |
| 667645 | amsacrine    | -0.05   | 0.53 | 0.33 | -10.62  |
| 668495 | mitoxantrone | -0.10   | 0.61 | 0.27 | -8.08   |
| 669381 | amsacrine    | 0.43    | 0.56 | 0.22 | -8.71   |
| 669888 | amsacrine    | 0.16    | 0.57 | 0.22 | -9.29   |
| 669943 | amsacrine    | 0.10    | 0.52 | 0.22 | -9.20   |
| 673350 | ametrantrone | 0.37    | 0.56 | 0.32 | -9.06   |
| 673805 | amsacrine    | 0.11    | 0.53 | 0.33 | -9.81   |
| 674220 | mitoxantrone | 0.25    | 0.55 | 0.25 | -8.22   |
| 674256 | amsacrine    | 0.31    | 0.56 | 0.20 | -8.37   |
| 674257 | amsacrine    | 0.35    | 0.57 | 0.20 | -8.29   |
| 674258 | amsacrine    | 0.44    | 0.60 | 0.25 | -8.41   |
| 675370 | amsacrine    | 0.10    | 0.55 | 0.22 | -8.91   |
| 675985 | mitoxantrone | 0.39    | 0.53 | 0.24 | -9.81   |
| 676514 | amsacrine    | 0.12    | 0.56 | 0.30 | -9.50   |
| 678866 | amsacrine    | 0.29    | 0.53 | 0.19 | -8.16   |
| 679813 | mitoxantrone | 0.33    | 0.56 | 0.12 | -4.56   |
| 680781 | amsacrine    | 0.25    | 0.53 | 0.15 | -7.37   |
| 682011 | amsacrine    | 0.08    | 0.54 | 0.28 | -11.46  |
| 687308 | mitoxantrone | 0.29    | 0.56 | 0.21 | -14.20  |
| 687311 | amsacrine    | 0.24    | 0.77 | 0.26 | -8.89   |
| 691850 | mitoxantrone | 0.51    | 0.57 | 0.24 | -13.52  |
| 691851 | mitoxantrone | 0.27    | 0.56 | 0.25 | -13.68  |
| 692309 | amsacrine    | 0.03    | 0.52 | 0.22 | -7.89   |
| 692646 | amsacrine    | 0.28    | 0.65 | 0.27 | -8.95   |
| 692738 | ametrantrone | 0.24    | 0.52 | 0.30 | -12.96  |
| 693246 | amsacrine    | 0.34    | 0.52 | 0.25 | -7.39   |
| 693255 | mitoxantrone | -0.10   | 0.54 | 0.23 | -6.78   |
| 693620 | amsacrine    | 0.30    | 0.53 | 0.22 | -7.59   |

Continued on next page

| NSC    | lead         | BiolAct | ROCS | CFP  | docking |
|--------|--------------|---------|------|------|---------|
| 695177 | amsacrine    | 0.41    | 0.55 | 0.27 | -7.28   |
| 696991 | mitoxantrone | -0.00   | 0.53 | 0.31 | -7.15   |
| 698959 | mitoxantrone | 0.38    | 0.54 | 0.24 | -13.35  |
| 698960 | mitoxantrone | 0.39    | 0.56 | 0.23 | -13.35  |
| 699147 | ametrantrone | 0.23    | 0.53 | 0.22 | -11.33  |
| 699149 | ametrantrone | 0.44    | 0.53 | 0.21 | -10.93  |
| 699152 | mitoxantrone | 0.40    | 0.54 | 0.26 | -10.91  |
| 700415 | amsacrine    | 0.17    | 0.53 | 0.19 | -11.60  |
| 701023 | amsacrine    | 0.26    | 0.52 | 0.22 | -10.18  |
| 710546 | mitoxantrone | 0.28    | 0.54 | 0.20 | -12.91  |
| 710547 | mitoxantrone | 0.03    | 0.53 | 0.23 | -14.07  |
| 710548 | mitoxantrone | 0.46    | 0.53 | 0.23 | -14.02  |
| 710549 | ametrantrone | 0.15    | 0.53 | 0.21 | -13.37  |
| 711725 | amsacrine    | 0.27    | 0.56 | 0.30 | -8.44   |
| 719923 | amsacrine    | 0.33    | 0.58 | 0.22 | -8.06   |
| 720558 | amsacrine    | -0.00   | 0.70 | 0.34 | -10.69  |
| 720563 | amsacrine    | 0.02    | 0.53 | 0.30 | -8.55   |
| 720570 | amsacrine    | 0.16    | 0.77 | 0.33 | -10.19  |
| 720688 | mitoxantrone | 0.11    | 0.53 | 0.24 | -12.74  |
| 723394 | mitoxantrone | 0.24    | 0.53 | 0.28 | -6.96   |
| 723423 | ametrantrone | 0.25    | 0.70 | 0.17 | -9.06   |
| 724686 | amsacrine    | 0.30    | 0.70 | 0.33 | -9.55   |
| 724693 | amsacrine    | 0.04    | 0.64 | 0.28 | -9.92   |
| 724699 | amsacrine    | 0.30    | 0.58 | 0.33 | -9.11   |
| 726438 | ametrantrone | 0.10    | 0.53 | 0.31 | -11.17  |
| 727450 | amsacrine    | 0.05    | 0.55 | 0.33 | -10.20  |
| 727885 | amsacrine    | 0.21    | 0.54 | 0.18 | -9.01   |
| 731164 | mitoxantrone | 0.23    | 0.53 | 0.24 | -8.42   |
| 734631 | amsacrine    | 0.26    | 0.53 | 0.29 | -9.11   |
| 736793 | amsacrine    | 0.30    | 0.52 | 0.18 | -9.89   |
| 740650 | ametrantrone | 0.51    | 0.54 | 0.28 | -13.00  |
| 744231 | ametrantrone | 0.36    | 0.55 | 0.22 | -11.51  |
| 745450 | amsacrine    | 0.22    | 0.55 | 0.24 | -8.58   |
| 745455 | amsacrine    | 0.27    | 0.54 | 0.24 | -8.66   |
| 745750 | mitoxantrone | -0.18   | 0.53 | 0.26 | -9.00   |
| 748392 | amsacrine    | 0.20    | 0.54 | 0.31 | -12.65  |
| 748393 | amsacrine    | 0.25    | 0.53 | 0.31 | -12.12  |
| 748533 | amsacrine    | 0.18    | 0.58 | 0.22 | -8.64   |
| 748870 | amsacrine    | 0.24    | 0.52 | 0.23 | -10.24  |
| 749804 | amsacrine    | 0.16    | 0.55 | 0.22 | -8.70   |
| 751830 | amsacrine    | -0.03   | 0.56 | 0.28 | -8.62   |

Table S6: Similarities compared to published Top2 ligands and docking scores of biological activity decoy agents.

| NSC   | lead         | BiolAct | ROCS | CFP  | docking |
|-------|--------------|---------|------|------|---------|
| 762   | mitoxantrone | 0.60    | 0.17 | 0.05 | -4.67   |
| 3424  | mitoxantrone | 0.59    | 0.42 | 0.27 | -10.14  |
| 4623  | etoposide    | 0.61    | 0.27 | 0.15 | -6.89   |
| 6171  | ametrantrone | 0.55    | 0.24 | 0.06 | -5.42   |
| 6396  | mitoxantrone | 0.72    | 0.19 | 0.05 | -5.23   |
| 9706  | mitoxantrone | 0.73    | 0.36 | 0.08 | -6.15   |
| 12150 | ametrantrone | 0.55    | 0.34 | 0.26 | -10.37  |
| 12455 | ametrantrone | 0.53    | 0.30 | 0.22 | -4.38   |
| 19781 | etoposide    | 0.61    | 0.33 | 0.16 | -6.71   |
| 22709 | etoposide    | 0.55    | 0.17 | 0.10 | -5.97   |
| 22984 | etoposide    | 0.59    | 0.21 | 0.16 | -5.97   |
| 26821 | etoposide    | 0.60    | 0.28 | 0.11 | -7.81   |
| 26980 | mitoxantrone | 0.74    | 0.40 | 0.20 | -9.46   |
| 29228 | etoposide    | 0.57    | 0.22 | 0.02 | -2.96   |
| 30706 | etoposide    | 0.61    | 0.21 | 0.11 | -7.12   |
| 31717 | amsacrine    | 0.58    | 0.31 | 0.08 | -7.78   |
| 32065 | mitoxantrone | 0.54    | 0.14 | 0.04 | -5.38   |
| 34462 | mitoxantrone | 0.72    | 0.30 | 0.14 | -7.57   |
| 35915 | mitoxantrone | 0.69    | 0.25 | 0.11 | -8.60   |
| 48006 | amsacrine    | 0.52    | 0.40 | 0.16 | -8.21   |

Continued on next page

| NSC    | lead         | BiolAct | ROCS | CFP  | docking |
|--------|--------------|---------|------|------|---------|
| 48034  | mitoxantrone | 0.70    | 0.32 | 0.24 | -8.07   |
| 48956  | mitoxantrone | 0.60    | 0.29 | 0.25 | -8.05   |
| 49520  | etoposide    | 0.52    | 0.24 | 0.14 | -8.13   |
| 50273  | amsacrine    | 0.52    | 0.41 | 0.22 | -7.92   |
| 56410  | mitoxantrone | 0.69    | 0.39 | 0.20 | -10.48  |
| 57199  | mitoxantrone | 0.66    | 0.34 | 0.31 | -8.52   |
| 58514  | mitoxantrone | 0.53    | 0.10 | 0.28 | -8.59   |
| 62709  | mitoxantrone | 0.56    | 0.34 | 0.24 | -6.72   |
| 63878  | mitoxantrone | 0.62    | 0.31 | 0.17 | -8.48   |
| 64703  | mitoxantrone | 0.64    | 0.34 | 0.24 | -8.01   |
| 72151  | amsacrine    | 0.61    | 0.31 | 0.23 | -7.98   |
| 73735  | etoposide    | 0.62    | 0.32 | 0.25 | -7.35   |
| 75520  | mitoxantrone | 0.54    | 0.39 | 0.19 | -8.47   |
| 76919  | mitoxantrone | 0.60    | 0.34 | 0.27 | -7.46   |
| 79037  | etoposide    | 0.59    | 0.24 | 0.07 | -5.56   |
| 80103  | mitoxantrone | 0.61    | 0.28 | 0.11 | -8.60   |
| 81767  | amsacrine    | 0.67    | 0.39 | 0.21 | -8.38   |
| 82587  | mitoxantrone | 0.60    | 0.31 | 0.29 | -9.52   |
| 83343  | amsacrine    | 0.56    | 0.39 | 0.21 | -7.88   |
| 85230  | mitoxantrone | 0.72    | 0.35 | 0.25 | -8.92   |
| 86371  | etoposide    | 0.59    | 0.31 | 0.22 | -10.25  |
| 90810  | etoposide    | 0.63    | 0.30 | 0.14 | -7.67   |
| 92497  | etoposide    | 0.62    | 0.22 | 0.13 | -6.54   |
| 92498  | etoposide    | 0.57    | 0.21 | 0.14 | -6.97   |
| 92499  | etoposide    | 0.57    | 0.20 | 0.14 | -6.66   |
| 94600  | mitoxantrone | 0.63    | 0.37 | 0.27 | -9.63   |
| 95382  | mitoxantrone | 0.73    | 0.35 | 0.26 | -8.78   |
| 95466  | mitoxantrone | 0.60    | 0.31 | 0.12 | -6.68   |
| 98572  | amsacrine    | 0.53    | 0.43 | 0.18 | -8.35   |
| 99445  | mitoxantrone | 0.53    | 0.36 | 0.18 | -8.95   |
| 103704 | amsacrine    | 0.54    | 0.40 | 0.15 | -8.03   |
| 105132 | mitoxantrone | 0.69    | 0.37 | 0.27 | -9.42   |
| 107124 | mitoxantrone | 0.68    | 0.42 | 0.27 | -10.70  |
| 107392 | etoposide    | 0.53    | 0.23 | 0.13 | -7.96   |
| 111533 | mitoxantrone | 0.74    | 0.37 | 0.27 | -9.34   |
| 112758 | ametantrone  | 0.70    | 0.40 | 0.28 | -10.33  |
| 112965 | amsacrine    | 0.67    | 0.43 | 0.17 | -7.36   |
| 114346 | etoposide    | 0.56    | 0.33 | 0.30 | -8.51   |
| 122870 | amsacrine    | 0.57    | 0.35 | 0.24 | -7.95   |
| 123115 | mitoxantrone | 0.66    | 0.39 | 0.20 | -9.32   |
| 124147 | ametantrone  | 0.58    | 0.36 | 0.21 | -7.76   |
| 126849 | amsacrine    | 0.54    | 0.36 | 0.13 | -7.87   |
| 127763 | etoposide    | 0.62    | 0.33 | 0.24 | -9.14   |
| 128687 | etoposide    | 0.65    | 0.33 | 0.26 | -7.58   |
| 129943 | amsacrine    | 0.58    | 0.38 | 0.06 | -8.43   |
| 131547 | ametantrone  | 0.56    | 0.36 | 0.23 | -10.88  |
| 132313 | mitoxantrone | 0.70    | 0.31 | 0.05 | -4.38   |
| 134459 | etoposide    | 0.59    | 0.25 | 0.12 | -6.90   |
| 134679 | mitoxantrone | 0.52    | 0.41 | 0.17 | -8.70   |
| 134723 | mitoxantrone | 0.62    | 0.40 | 0.20 | -9.10   |
| 134725 | mitoxantrone | 0.62    | 0.40 | 0.20 | -9.19   |
| 134727 | mitoxantrone | 0.65    | 0.46 | 0.20 | -9.51   |
| 135758 | mitoxantrone | 0.65    | 0.32 | 0.11 | -9.45   |
| 135962 | ametantrone  | 0.55    | 0.33 | 0.15 | -7.55   |
| 138429 | etoposide    | 0.55    | 0.39 | 0.31 | -7.38   |
| 140701 | mitoxantrone | 0.71    | 0.34 | 0.18 | -11.32  |
| 141537 | etoposide    | 0.53    | 0.30 | 0.27 | -6.98   |
| 143095 | amsacrine    | 0.54    | 0.41 | 0.18 | -6.97   |
| 143491 | ametantrone  | 0.67    | 0.40 | 0.28 | -11.57  |
| 145668 | amsacrine    | 0.72    | 0.37 | 0.16 | -9.29   |
| 146268 | amsacrine    | 0.53    | 0.40 | 0.14 | -8.66   |
| 146396 | mitoxantrone | 0.53    | 0.36 | 0.33 | -8.88   |
| 146397 | ametantrone  | 0.56    | 0.35 | 0.18 | -10.19  |
| 149584 | ametantrone  | 0.70    | 0.35 | 0.27 | -11.08  |
| 150862 | mitoxantrone | 0.52    | 0.16 | 0.24 | -11.87  |
| 152731 | ametantrone  | 0.54    | 0.43 | 0.19 | -10.11  |
| 154318 | mitoxantrone | 0.70    | 0.41 | 0.22 | -10.71  |
| 155693 | ametantrone  | 0.53    | 0.39 | 0.19 | -11.06  |
| 155694 | ametantrone  | 0.59    | 0.42 | 0.19 | -11.62  |
| 156305 | mitoxantrone | 0.65    | 0.40 | 0.18 | -10.58  |

Continued on next page

| NSC    | lead         | BiolAct | ROCS | CFP  | docking |
|--------|--------------|---------|------|------|---------|
| 157995 | ametantrone  | 0.53    | 0.37 | 0.16 | -10.20  |
| 162062 | etoposide    | 0.53    | 0.26 | 0.12 | -6.48   |
| 166199 | mitoxantrone | 0.66    | 0.31 | 0.10 | -6.74   |
| 166224 | amsacrine    | 0.56    | 0.34 | 0.21 | -7.36   |
| 166237 | etoposide    | 0.69    | 0.32 | 0.23 | -8.08   |
| 166641 | mitoxantrone | 0.54    | 0.33 | 0.18 | -9.54   |
| 167780 | etoposide    | 0.69    | 0.29 | 0.28 | -7.89   |
| 169534 | ametantrone  | 0.68    | 0.40 | 0.28 | -10.37  |
| 176323 | amsacrine    | 0.70    | 0.40 | 0.26 | -8.73   |
| 176878 | ametantrone  | 0.54    | 0.27 | 0.20 | -7.18   |
| 177365 | ametantrone  | 0.53    | 0.34 | 0.20 | -10.98  |
| 178248 | mitoxantrone | 0.57    | 0.32 | 0.14 | -7.46   |
| 180510 | ametantrone  | 0.60    | 0.40 | 0.29 | -11.83  |
| 182986 | mitoxantrone | 0.68    | 0.38 | 0.13 | -7.13   |
| 184692 | amsacrine    | 0.54    | 0.35 | 0.23 | -7.99   |
| 196473 | etoposide    | 0.64    | 0.39 | 0.23 | -13.45  |
| 201290 | etoposide    | 0.58    | 0.30 | 0.25 | -8.77   |
| 207895 | mitoxantrone | 0.55    | 0.40 | 0.26 | -9.36   |
| 221265 | ametantrone  | 0.68    | 0.34 | 0.28 | -12.38  |
| 234714 | amsacrine    | 0.69    | 0.44 | 0.07 | -6.66   |
| 237538 | mitoxantrone | 0.53    | 0.30 | 0.17 | -7.81   |
| 239336 | etoposide    | 0.71    | 0.26 | 0.25 | -6.98   |
| 243928 | mitoxantrone | 0.80    | 0.37 | 0.21 | -11.01  |
| 243929 | mitoxantrone | 0.69    | 0.36 | 0.21 | -10.82  |
| 243930 | mitoxantrone | 0.72    | 0.35 | 0.20 | -9.46   |
| 249910 | mitoxantrone | 0.58    | 0.37 | 0.26 | -8.71   |
| 249911 | mitoxantrone | 0.67    | 0.38 | 0.26 | -9.72   |
| 249992 | ametantrone  | 0.64    | 0.39 | 0.19 | -10.94  |
| 250684 | mitoxantrone | 0.55    | 0.28 | 0.19 | -9.35   |
| 250686 | etoposide    | 0.60    | 0.29 | 0.25 | -7.85   |
| 256438 | amsacrine    | 0.69    | 0.37 | 0.18 | -10.74  |
| 259968 | ametantrone  | 0.53    | 0.26 | 0.25 | -6.53   |
| 259969 | ametantrone  | 0.59    | 0.26 | 0.24 | -5.81   |
| 260610 | ametantrone  | 0.56    | 0.29 | 0.23 | -11.24  |
| 266068 | mitoxantrone | 0.52    | 0.31 | 0.26 | -9.24   |
| 267707 | etoposide    | 0.57    | 0.30 | 0.29 | -6.83   |
| 268965 | amsacrine    | 0.65    | 0.38 | 0.19 | -7.78   |
| 269719 | mitoxantrone | 0.58    | 0.35 | 0.16 | -8.46   |
| 269720 | amsacrine    | 0.55    | 0.42 | 0.12 | -6.79   |
| 269721 | mitoxantrone | 0.58    | 0.35 | 0.15 | -7.75   |
| 275656 | mitoxantrone | 0.70    | 0.35 | 0.13 | -6.93   |
| 280074 | etoposide    | 0.56    | 0.27 | 0.28 | -8.37   |
| 281272 | mitoxantrone | 0.55    | 0.33 | 0.16 | -8.37   |
| 281612 | amsacrine    | 0.62    | 0.41 | 0.19 | -8.32   |
| 281613 | mitoxantrone | 0.57    | 0.27 | 0.27 | -7.69   |
| 281617 | mitoxantrone | 0.54    | 0.27 | 0.28 | -9.05   |
| 281817 | mitoxantrone | 0.53    | 0.27 | 0.27 | -9.44   |
| 281818 | mitoxantrone | 0.53    | 0.26 | 0.29 | -7.19   |
| 284682 | amsacrine    | 0.56    | 0.35 | 0.19 | -9.78   |
| 286628 | ametantrone  | 0.54    | 0.37 | 0.27 | -11.34  |
| 292463 | etoposide    | 0.57    | 0.29 | 0.29 | -5.93   |
| 294980 | mitoxantrone | 0.67    | 0.28 | 0.21 | -6.99   |
| 295499 | mitoxantrone | 0.76    | 0.39 | 0.26 | -9.41   |
| 295500 | mitoxantrone | 0.83    | 0.38 | 0.27 | -9.27   |
| 295501 | mitoxantrone | 0.53    | 0.38 | 0.27 | -10.03  |
| 296934 | mitoxantrone | 0.62    | 0.40 | 0.11 | -5.44   |
| 300288 | mitoxantrone | 0.76    | 0.45 | 0.28 | -11.14  |
| 301477 | ametantrone  | 0.62    | 0.39 | 0.27 | -11.09  |
| 301480 | amsacrine    | 0.52    | 0.38 | 0.18 | -8.67   |
| 301739 | etoposide    | 0.75    | 0.38 | 0.31 | -13.14  |
| 302325 | amsacrine    | 0.53    | 0.40 | 0.17 | -8.49   |
| 302991 | amsacrine    | 0.66    | 0.39 | 0.25 | -9.63   |
| 303812 | mitoxantrone | 0.61    | 0.41 | 0.11 | -7.98   |
| 307990 | ametantrone  | 0.56    | 0.37 | 0.26 | -10.84  |
| 314622 | mitoxantrone | 0.55    | 0.39 | 0.33 | -9.64   |
| 319726 | amsacrine    | 0.53    | 0.41 | 0.16 | -7.63   |
| 324646 | ametantrone  | 0.64    | 0.29 | 0.12 | -8.67   |
| 328410 | mitoxantrone | 0.78    | 0.37 | 0.26 | -8.88   |
| 331269 | mitoxantrone | 0.61    | 0.40 | 0.14 | -5.88   |
| 332488 | amsacrine    | 0.67    | 0.38 | 0.13 | -5.36   |

Continued on next page

| NSC    | lead         | BiolAct | ROCS | CFP  | docking |
|--------|--------------|---------|------|------|---------|
| 333054 | amsacrine    | 0.77    | 0.37 | 0.19 | -10.52  |
| 335766 | etoposide    | 0.57    | 0.30 | 0.27 | -7.76   |
| 339705 | mitoxantrone | 0.62    | 0.41 | 0.30 | -10.40  |
| 342443 | ametrantrone | 0.55    | 0.26 | 0.15 | -11.05  |
| 344007 | mitoxantrone | 0.71    | 0.28 | 0.08 | -6.84   |
| 344505 | amsacrine    | 0.63    | 0.43 | 0.19 | -9.25   |
| 348115 | amsacrine    | 0.52    | 0.40 | 0.23 | -10.09  |
| 348894 | mitoxantrone | 0.85    | 0.40 | 0.23 | -11.23  |
| 350378 | etoposide    | 0.54    | 0.36 | 0.25 | -10.00  |
| 351520 | etoposide    | 0.54    | 0.33 | 0.24 | -9.22   |
| 353076 | ametrantrone | 0.56    | 0.43 | 0.20 | -12.63  |
| 355457 | mitoxantrone | 0.53    | 0.37 | 0.34 | -11.51  |
| 357885 | etoposide    | 0.70    | 0.41 | 0.30 | -14.19  |
| 360702 | mitoxantrone | 0.63    | 0.40 | 0.17 | -7.97   |
| 364830 | mitoxantrone | 0.72    | 0.42 | 0.26 | -9.39   |
| 365360 | ametrantrone | 0.69    | 0.30 | 0.25 | -11.64  |
| 367428 | amsacrine    | 0.66    | 0.34 | 0.09 | -5.75   |
| 369395 | amsacrine    | 0.60    | 0.38 | 0.24 | -10.73  |
| 374028 | mitoxantrone | 0.69    | 0.40 | 0.27 | -11.60  |
| 375575 | amsacrine    | 0.59    | 0.40 | 0.16 | -8.07   |
| 376254 | mitoxantrone | 0.58    | 0.36 | 0.30 | -8.15   |
| 376739 | ametrantrone | 0.65    | 0.40 | 0.27 | -9.25   |
| 378901 | ametrantrone | 0.61    | 0.39 | 0.27 | -10.08  |
| 380212 | amsacrine    | 0.53    | 0.40 | 0.18 | -8.85   |
| 382001 | etoposide    | 0.52    | 0.24 | 0.18 | -7.73   |
| 382035 | amsacrine    | 0.56    | 0.43 | 0.19 | -8.43   |
| 400492 | etoposide    | 0.58    | 0.26 | 0.16 | -7.86   |
| 407335 | mitoxantrone | 0.56    | 0.33 | 0.17 | -8.41   |
| 529180 | amsacrine    | 0.60    | 0.40 | 0.17 | -8.21   |
| 600167 | mitoxantrone | 0.59    | 0.28 | 0.18 | -7.28   |
| 603071 | amsacrine    | 0.60    | 0.38 | 0.25 | -10.20  |
| 606172 | mitoxantrone | 0.66    | 0.40 | 0.27 | -10.17  |
| 606173 | mitoxantrone | 0.77    | 0.43 | 0.26 | -9.34   |
| 606174 | amsacrine    | 0.55    | 0.37 | 0.25 | -10.16  |
| 606497 | mitoxantrone | 0.69    | 0.42 | 0.26 | -9.32   |
| 606498 | mitoxantrone | 0.62    | 0.41 | 0.26 | -9.55   |
| 606499 | mitoxantrone | 0.82    | 0.42 | 0.26 | -10.21  |
| 606985 | mitoxantrone | 0.58    | 0.39 | 0.26 | -10.23  |
| 606986 | amsacrine    | 0.67    | 0.37 | 0.25 | -9.87   |
| 607347 | mitoxantrone | 0.57    | 0.33 | 0.08 | -7.52   |
| 609699 | mitoxantrone | 0.67    | 0.38 | 0.28 | -9.76   |
| 610456 | mitoxantrone | 0.56    | 0.38 | 0.26 | -7.85   |
| 610457 | mitoxantrone | 0.57    | 0.40 | 0.26 | -10.47  |
| 610458 | mitoxantrone | 0.79    | 0.34 | 0.26 | -6.72   |
| 610459 | mitoxantrone | 0.67    | 0.40 | 0.26 | -9.31   |
| 612828 | amsacrine    | 0.58    | 0.43 | 0.14 | -8.14   |
| 613327 | mitoxantrone | 0.54    | 0.34 | 0.19 | -7.95   |
| 614049 | etoposide    | 0.56    | 0.36 | 0.21 | -11.78  |
| 616348 | mitoxantrone | 0.72    | 0.31 | 0.27 | -10.52  |
| 617208 | etoposide    | 0.57    | 0.22 | 0.20 | -8.09   |
| 617806 | etoposide    | 0.62    | 0.23 | 0.05 | -7.21   |
| 617953 | ametrantrone | 0.52    | 0.43 | 0.25 | -10.00  |
| 618939 | mitoxantrone | 0.67    | 0.42 | 0.26 | -9.12   |
| 619003 | amsacrine    | 0.84    | 0.35 | 0.18 | -9.24   |
| 620480 | mitoxantrone | 0.61    | 0.29 | 0.25 | -8.71   |
| 621199 | etoposide    | 0.53    | 0.41 | 0.30 | -10.14  |
| 623128 | amsacrine    | 0.68    | 0.36 | 0.18 | -9.84   |
| 623872 | etoposide    | 0.65    | 0.26 | 0.20 | -7.49   |
| 623905 | etoposide    | 0.54    | 0.38 | 0.28 | -8.11   |
| 624158 | etoposide    | 0.58    | 0.33 | 0.12 | -7.14   |
| 624414 | etoposide    | 0.57    | 0.36 | 0.28 | -9.66   |
| 624431 | etoposide    | 0.57    | 0.41 | 0.32 | -9.10   |
| 624432 | etoposide    | 0.61    | 0.37 | 0.28 | -8.25   |
| 624434 | etoposide    | 0.52    | 0.27 | 0.28 | -8.62   |
| 624851 | etoposide    | 0.62    | 0.17 | 0.05 | -5.45   |
| 625156 | etoposide    | 0.53    | 0.28 | 0.22 | -3.21   |
| 625174 | etoposide    | 0.53    | 0.22 | 0.10 | -6.86   |
| 626540 | etoposide    | 0.53    | 0.37 | 0.21 | -11.54  |
| 628497 | mitoxantrone | 0.63    | 0.43 | 0.28 | -9.96   |
| 628498 | mitoxantrone | 0.53    | 0.44 | 0.26 | -11.87  |

Continued on next page



| NSC    | lead         | BiolAct | ROCS | CFP  | docking |
|--------|--------------|---------|------|------|---------|
| 628662 | amsacrine    | 0.87    | 0.37 | 0.22 | -11.71  |
| 628663 | ametrantrone | 0.60    | 0.39 | 0.28 | -12.42  |
| 628664 | ametrantrone | 0.57    | 0.37 | 0.29 | -12.38  |
| 628665 | mitoxantrone | 0.70    | 0.38 | 0.34 | -11.87  |
| 628666 | mitoxantrone | 0.70    | 0.37 | 0.33 | -11.80  |
| 628667 | amsacrine    | 0.83    | 0.36 | 0.22 | -11.69  |
| 628668 | ametrantrone | 0.55    | 0.38 | 0.27 | -12.48  |
| 628669 | amsacrine    | 0.90    | 0.38 | 0.21 | -12.20  |
| 628670 | ametrantrone | 0.53    | 0.38 | 0.29 | -12.21  |
| 628671 | amsacrine    | 0.83    | 0.39 | 0.21 | -12.21  |
| 628672 | ametrantrone | 0.60    | 0.38 | 0.29 | -12.15  |
| 628673 | amsacrine    | 0.73    | 0.36 | 0.22 | -10.04  |
| 628674 | amsacrine    | 0.83    | 0.37 | 0.22 | -11.66  |
| 628675 | amsacrine    | 0.82    | 0.36 | 0.21 | -12.49  |
| 628676 | ametrantrone | 0.61    | 0.38 | 0.28 | -11.57  |
| 628677 | amsacrine    | 0.79    | 0.37 | 0.22 | -11.71  |
| 628678 | amsacrine    | 0.87    | 0.36 | 0.22 | -12.80  |
| 628679 | mitoxantrone | 0.76    | 0.37 | 0.34 | -11.57  |
| 628680 | amsacrine    | 0.86    | 0.38 | 0.21 | -11.60  |
| 628681 | amsacrine    | 0.53    | 0.38 | 0.20 | -11.20  |
| 628908 | etoposide    | 0.55    | 0.26 | 0.19 | -8.25   |
| 628918 | etoposide    | 0.59    | 0.32 | 0.23 | -10.70  |
| 629266 | mitoxantrone | 0.53    | 0.39 | 0.26 | -9.44   |
| 629874 | etoposide    | 0.54    | 0.34 | 0.21 | -7.60   |
| 629971 | mitoxantrone | 0.65    | 0.37 | 0.26 | -10.20  |
| 630604 | etoposide    | 0.55    | 0.33 | 0.21 | -7.53   |
| 630699 | mitoxantrone | 0.52    | 0.46 | 0.27 | -12.68  |
| 630700 | mitoxantrone | 0.66    | 0.42 | 0.26 | -12.01  |
| 630701 | ametrantrone | 0.54    | 0.38 | 0.24 | -12.55  |
| 630702 | mitoxantrone | 0.75    | 0.38 | 0.26 | -11.79  |
| 631197 | mitoxantrone | 0.62    | 0.43 | 0.26 | -11.72  |
| 631199 | ametrantrone | 0.56    | 0.44 | 0.25 | -11.18  |
| 631939 | amsacrine    | 0.61    | 0.32 | 0.07 | -8.38   |
| 633403 | etoposide    | 0.54    | 0.33 | 0.27 | -11.24  |
| 634458 | etoposide    | 0.62    | 0.25 | 0.06 | -0.81   |
| 634724 | amsacrine    | 0.77    | 0.37 | 0.25 | -10.16  |
| 635405 | etoposide    | 0.56    | 0.33 | 0.30 | -7.60   |
| 637126 | amsacrine    | 0.54    | 0.41 | 0.31 | -10.37  |
| 637140 | mitoxantrone | 0.55    | 0.42 | 0.27 | -9.12   |
| 637611 | ametrantrone | 0.56    | 0.29 | 0.30 | -8.02   |
| 637651 | ametrantrone | 0.54    | 0.38 | 0.21 | -9.60   |
| 638404 | mitoxantrone | 0.52    | 0.36 | 0.20 | -7.65   |
| 638441 | mitoxantrone | 0.52    | 0.36 | 0.17 | -9.08   |
| 638856 | mitoxantrone | 0.57    | 0.29 | 0.19 | -8.93   |
| 639174 | mitoxantrone | 0.60    | 0.37 | 0.27 | -9.81   |
| 639176 | amsacrine    | 0.70    | 0.38 | 0.26 | -9.46   |
| 639519 | etoposide    | 0.53    | 0.29 | 0.18 | -9.73   |
| 639659 | ametrantrone | 0.65    | 0.38 | 0.27 | -9.69   |
| 639831 | mitoxantrone | 0.58    | 0.34 | 0.20 | -10.25  |
| 639832 | mitoxantrone | 0.61    | 0.32 | 0.20 | -10.22  |
| 640085 | ametrantrone | 0.61    | 0.30 | 0.21 | -7.63   |
| 641454 | amsacrine    | 0.54    | 0.39 | 0.23 | -8.60   |
| 641533 | etoposide    | 0.54    | 0.19 | 0.07 | -6.05   |
| 642276 | amsacrine    | 0.59    | 0.38 | 0.22 | -11.43  |
| 642277 | ametrantrone | 0.59    | 0.44 | 0.28 | -11.28  |
| 642278 | mitoxantrone | 0.84    | 0.39 | 0.34 | -11.29  |
| 642279 | mitoxantrone | 0.83    | 0.40 | 0.32 | -12.74  |
| 642280 | mitoxantrone | 0.74    | 0.41 | 0.34 | -11.61  |
| 642281 | mitoxantrone | 0.76    | 0.41 | 0.31 | -11.37  |
| 642282 | mitoxantrone | 0.75    | 0.40 | 0.31 | -13.08  |
| 642283 | mitoxantrone | 0.56    | 0.40 | 0.31 | -12.92  |
| 642284 | mitoxantrone | 0.76    | 0.42 | 0.31 | -12.77  |
| 642285 | mitoxantrone | 0.76    | 0.38 | 0.34 | -10.96  |
| 642286 | mitoxantrone | 0.73    | 0.39 | 0.33 | -11.09  |
| 642287 | mitoxantrone | 0.74    | 0.42 | 0.31 | -13.43  |
| 642288 | mitoxantrone | 0.53    | 0.40 | 0.33 | -10.71  |
| 642289 | mitoxantrone | 0.77    | 0.40 | 0.31 | -11.32  |
| 642290 | mitoxantrone | 0.73    | 0.38 | 0.34 | -11.21  |
| 642291 | mitoxantrone | 0.73    | 0.40 | 0.32 | -9.42   |
| 642292 | mitoxantrone | 0.67    | 0.38 | 0.32 | -11.54  |

Continued on next page

| NSC    | lead         | BiolAct | ROCS | CFP  | docking |
|--------|--------------|---------|------|------|---------|
| 642293 | mitoxantrone | 0.69    | 0.40 | 0.32 | -11.23  |
| 642318 | amsacrine    | 0.53    | 0.40 | 0.21 | -8.44   |
| 642321 | etoposide    | 0.58    | 0.38 | 0.25 | -7.98   |
| 642322 | mitoxantrone | 0.80    | 0.45 | 0.30 | -11.64  |
| 642323 | mitoxantrone | 0.79    | 0.42 | 0.30 | -11.96  |
| 642324 | mitoxantrone | 0.80    | 0.41 | 0.29 | -11.24  |
| 642328 | ametrantrone | 0.57    | 0.38 | 0.28 | -10.79  |
| 642329 | ametrantrone | 0.56    | 0.36 | 0.28 | -10.54  |
| 642911 | mitoxantrone | 0.57    | 0.31 | 0.16 | -7.33   |
| 642915 | mitoxantrone | 0.75    | 0.31 | 0.16 | -8.69   |
| 643001 | etoposide    | 0.56    | 0.31 | 0.22 | -5.92   |
| 643006 | mitoxantrone | 0.65    | 0.33 | 0.16 | -7.50   |
| 643833 | mitoxantrone | 0.55    | 0.39 | 0.26 | -9.52   |
| 644945 | mitoxantrone | 0.79    | 0.46 | 0.33 | -11.50  |
| 644946 | mitoxantrone | 0.81    | 0.44 | 0.33 | -12.49  |
| 644947 | ametrantrone | 0.60    | 0.43 | 0.28 | -11.67  |
| 644960 | mitoxantrone | 0.67    | 0.32 | 0.19 | -9.10   |
| 644961 | mitoxantrone | 0.66    | 0.31 | 0.18 | -8.95   |
| 644967 | amsacrine    | 0.57    | 0.36 | 0.11 | -7.93   |
| 645008 | mitoxantrone | 0.57    | 0.44 | 0.24 | -11.91  |
| 645017 | etoposide    | 0.73    | 0.31 | 0.30 | -13.23  |
| 645018 | etoposide    | 0.79    | 0.37 | 0.31 | -13.57  |
| 645737 | mitoxantrone | 0.79    | 0.42 | 0.33 | -12.30  |
| 646714 | amsacrine    | 0.76    | 0.34 | 0.08 | -7.68   |
| 648114 | mitoxantrone | 0.74    | 0.39 | 0.21 | -10.29  |
| 648147 | etoposide    | 0.54    | 0.30 | 0.21 | -10.20  |
| 648316 | mitoxantrone | 0.58    | 0.40 | 0.19 | -8.26   |
| 649677 | mitoxantrone | 0.80    | 0.39 | 0.22 | -12.82  |
| 650259 | ametrantrone | 0.53    | 0.42 | 0.18 | -10.57  |
| 650931 | ametrantrone | 0.60    | 0.39 | 0.27 | -10.65  |
| 651777 | amsacrine    | 0.54    | 0.49 | 0.19 | -9.01   |
| 651850 | mitoxantrone | 0.73    | 0.43 | 0.32 | -12.07  |
| 651855 | mitoxantrone | 0.67    | 0.40 | 0.32 | -12.77  |
| 651857 | mitoxantrone | 0.71    | 0.42 | 0.33 | -12.88  |
| 651861 | mitoxantrone | 0.75    | 0.42 | 0.32 | -12.27  |
| 653438 | mitoxantrone | 0.58    | 0.47 | 0.25 | -12.67  |
| 653842 | amsacrine    | 0.54    | 0.44 | 0.17 | -8.74   |
| 653860 | mitoxantrone | 0.78    | 0.47 | 0.32 | -13.37  |
| 653862 | amsacrine    | 0.55    | 0.12 | 0.22 | -9.68   |
| 653863 | mitoxantrone | 0.67    | 0.43 | 0.32 | -12.57  |
| 653864 | ametrantrone | 0.54    | 0.45 | 0.25 | -12.57  |
| 654509 | amsacrine    | 0.77    | 0.36 | 0.19 | -10.13  |
| 654830 | amsacrine    | 0.56    | 0.38 | 0.20 | -9.24   |
| 656903 | etoposide    | 0.52    | 0.39 | 0.33 | -7.68   |
| 656904 | etoposide    | 0.53    | 0.38 | 0.32 | -7.38   |
| 657339 | etoposide    | 0.58    | 0.31 | 0.22 | -7.83   |
| 657446 | etoposide    | 0.53    | 0.37 | 0.27 | -9.88   |
| 658229 | etoposide    | 0.55    | 0.27 | 0.18 | -8.06   |
| 659687 | mitoxantrone | 0.79    | 0.44 | 0.30 | -11.68  |
| 659948 | amsacrine    | 0.83    | 0.36 | 0.18 | -11.12  |
| 659949 | amsacrine    | 0.73    | 0.36 | 0.18 | -9.98   |
| 659950 | ametrantrone | 0.58    | 0.40 | 0.25 | -9.48   |
| 660027 | ametrantrone | 0.60    | 0.43 | 0.29 | -11.03  |
| 660028 | ametrantrone | 0.61    | 0.41 | 0.30 | -11.07  |
| 660029 | ametrantrone | 0.57    | 0.40 | 0.28 | -11.40  |
| 661226 | etoposide    | 0.53    | 0.34 | 0.28 | -9.66   |
| 662305 | mitoxantrone | 0.73    | 0.40 | 0.29 | -12.72  |
| 663249 | etoposide    | 0.63    | 0.25 | 0.11 | -7.60   |
| 663291 | etoposide    | 0.62    | 0.32 | 0.30 | -8.91   |
| 663790 | amsacrine    | 0.59    | 0.42 | 0.15 | -8.02   |
| 663791 | amsacrine    | 0.58    | 0.43 | 0.15 | -7.64   |
| 665350 | etoposide    | 0.62    | 0.35 | 0.30 | -9.71   |
| 665534 | mitoxantrone | 0.61    | 0.13 | 0.29 | -1.61   |
| 665934 | mitoxantrone | 0.80    | 0.44 | 0.32 | -12.80  |
| 665935 | mitoxantrone | 0.77    | 0.47 | 0.33 | -13.55  |
| 666871 | amsacrine    | 0.53    | 0.39 | 0.16 | -8.08   |
| 667047 | amsacrine    | 0.59    | 0.40 | 0.20 | -8.83   |
| 667070 | etoposide    | 0.57    | 0.25 | 0.17 | -6.53   |
| 667641 | amsacrine    | 0.56    | 0.28 | 0.21 | -8.96   |
| 667870 | amsacrine    | 0.54    | 0.34 | 0.15 | -7.16   |

Continued on next page

| NSC    | lead         | BiolAct | ROCS | CFP  | docking |
|--------|--------------|---------|------|------|---------|
| 668281 | mitoxantrone | 0.61    | 0.32 | 0.17 | -7.93   |
| 668352 | etoposide    | 0.52    | 0.27 | 0.16 | -8.43   |
| 668370 | etoposide    | 0.55    | 0.19 | 0.12 | -6.51   |
| 668380 | mitoxantrone | 0.77    | 0.40 | 0.30 | -12.81  |
| 668404 | mitoxantrone | 0.55    | 0.27 | 0.23 | -7.92   |
| 668523 | mitoxantrone | 0.64    | 0.19 | 0.05 | -5.47   |
| 668605 | etoposide    | 0.57    | 0.30 | 0.21 | -11.49  |
| 668834 | etoposide    | 0.54    | 0.32 | 0.30 | -7.01   |
| 668918 | etoposide    | 0.59    | 0.30 | 0.27 | -5.90   |
| 669727 | mitoxantrone | 0.58    | 0.42 | 0.18 | -8.12   |
| 669728 | mitoxantrone | 0.54    | 0.17 | 0.18 | -8.46   |
| 670013 | mitoxantrone | 0.67    | 0.30 | 0.31 | -9.62   |
| 670430 | etoposide    | 0.54    | 0.37 | 0.22 | -8.09   |
| 670653 | amsacrine    | 0.61    | 0.40 | 0.16 | -8.39   |
| 670654 | amsacrine    | 0.53    | 0.34 | 0.17 | -9.60   |
| 670656 | amsacrine    | 0.76    | 0.39 | 0.18 | -7.90   |
| 670807 | etoposide    | 0.53    | 0.24 | 0.08 | -6.20   |
| 671002 | mitoxantrone | 0.57    | 0.34 | 0.14 | -7.30   |
| 671014 | etoposide    | 0.59    | 0.32 | 0.22 | -9.26   |
| 671331 | etoposide    | 0.57    | 0.26 | 0.25 | -7.80   |
| 672974 | etoposide    | 0.57    | 0.30 | 0.24 | -8.13   |
| 672975 | mitoxantrone | 0.57    | 0.30 | 0.19 | -8.12   |
| 673150 | etoposide    | 0.60    | 0.27 | 0.19 | -4.53   |
| 673347 | etoposide    | 0.59    | 0.35 | 0.15 | -5.93   |
| 673348 | etoposide    | 0.54    | 0.34 | 0.24 | -8.95   |
| 673804 | ametrantrone | 0.56    | 0.43 | 0.25 | -11.35  |
| 673831 | amsacrine    | 0.58    | 0.41 | 0.16 | -6.86   |
| 673833 | amsacrine    | 0.66    | 0.36 | 0.15 | -7.17   |
| 673841 | etoposide    | 0.55    | 0.26 | 0.19 | -9.25   |
| 674182 | amsacrine    | 0.65    | 0.39 | 0.17 | -7.69   |
| 675249 | mitoxantrone | 0.64    | 0.32 | 0.28 | -11.13  |
| 675250 | mitoxantrone | 0.65    | 0.30 | 0.28 | -11.74  |
| 675251 | mitoxantrone | 0.53    | 0.32 | 0.30 | -10.73  |
| 675255 | mitoxantrone | 0.65    | 0.36 | 0.31 | -9.78   |
| 675256 | mitoxantrone | 0.53    | 0.28 | 0.25 | -7.99   |
| 675574 | mitoxantrone | 0.69    | 0.49 | 0.19 | -10.67  |
| 676316 | etoposide    | 0.54    | 0.37 | 0.22 | -8.25   |
| 678532 | etoposide    | 0.58    | 0.31 | 0.24 | -7.65   |
| 678880 | etoposide    | 0.53    | 0.35 | 0.21 | -7.92   |
| 678882 | etoposide    | 0.53    | 0.40 | 0.22 | -8.93   |
| 678914 | mitoxantrone | 0.59    | 0.49 | 0.25 | -10.89  |
| 679108 | etoposide    | 0.53    | 0.36 | 0.17 | -8.51   |
| 679265 | etoposide    | 0.55    | 0.36 | 0.23 | -10.27  |
| 680417 | mitoxantrone | 0.57    | 0.17 | 0.20 | -10.01  |
| 680420 | mitoxantrone | 0.55    | 0.30 | 0.20 | -10.20  |
| 680715 | etoposide    | 0.53    | 0.18 | 0.13 | -7.72   |
| 680717 | etoposide    | 0.54    | 0.31 | 0.23 | -8.06   |
| 681152 | etoposide    | 0.57    | 0.33 | 0.25 | -8.71   |
| 681324 | etoposide    | 0.54    | 0.27 | 0.20 | -6.80   |
| 681326 | etoposide    | 0.52    | 0.26 | 0.29 | -9.34   |
| 681462 | amsacrine    | 0.57    | 0.37 | 0.21 | -9.68   |
| 681632 | mitoxantrone | 0.66    | 0.36 | 0.27 | -10.73  |
| 681633 | mitoxantrone | 0.67    | 0.41 | 0.27 | -11.05  |
| 681634 | amsacrine    | 0.65    | 0.39 | 0.23 | -8.30   |
| 681635 | amsacrine    | 0.69    | 0.39 | 0.24 | -10.66  |
| 681636 | mitoxantrone | 0.67    | 0.39 | 0.27 | -10.49  |
| 681637 | mitoxantrone | 0.66    | 0.39 | 0.27 | -10.68  |
| 681638 | mitoxantrone | 0.66    | 0.39 | 0.26 | -10.73  |
| 681639 | mitoxantrone | 0.69    | 0.39 | 0.26 | -10.76  |
| 681640 | mitoxantrone | 0.61    | 0.36 | 0.26 | -10.76  |
| 681641 | mitoxantrone | 0.77    | 0.43 | 0.27 | -9.95   |
| 681642 | mitoxantrone | 0.76    | 0.39 | 0.27 | -10.60  |
| 681643 | mitoxantrone | 0.70    | 0.37 | 0.26 | -10.20  |
| 681644 | mitoxantrone | 0.74    | 0.44 | 0.27 | -10.10  |
| 681645 | mitoxantrone | 0.75    | 0.38 | 0.27 | -9.59   |
| 681646 | mitoxantrone | 0.64    | 0.39 | 0.27 | -10.13  |
| 682298 | mitoxantrone | 0.69    | 0.36 | 0.26 | -10.12  |
| 682306 | amsacrine    | 0.56    | 0.42 | 0.21 | -8.78   |
| 683140 | amsacrine    | 0.79    | 0.14 | 0.22 | -13.39  |
| 683247 | amsacrine    | 0.56    | 0.47 | 0.33 | -13.36  |

Continued on next page

| NSC    | lead         | BiolAct | ROCS | CFP  | docking |
|--------|--------------|---------|------|------|---------|
| 683252 | mitoxantrone | 0.62    | 0.41 | 0.26 | -6.47   |
| 683414 | amsacrine    | 0.86    | 0.37 | 0.21 | -9.86   |
| 683415 | mitoxantrone | 0.69    | 0.37 | 0.32 | -9.86   |
| 683416 | amsacrine    | 0.63    | 0.11 | 0.21 | -9.07   |
| 683556 | mitoxantrone | 0.56    | 0.08 | 0.27 | -7.78   |
| 683558 | mitoxantrone | 0.67    | 0.21 | 0.27 | -10.66  |
| 684667 | mitoxantrone | 0.68    | 0.48 | 0.24 | -11.17  |
| 684902 | mitoxantrone | 0.56    | 0.09 | 0.26 | -5.42   |
| 684906 | mitoxantrone | 0.56    | 0.10 | 0.24 | -5.57   |
| 684907 | mitoxantrone | 0.59    | 0.09 | 0.25 | -6.88   |
| 684908 | mitoxantrone | 0.57    | 0.09 | 0.26 | -6.81   |
| 684913 | amsacrine    | 0.53    | 0.38 | 0.18 | -8.64   |
| 685803 | amsacrine    | 0.55    | 0.47 | 0.23 | -7.57   |
| 687305 | amsacrine    | 0.59    | 0.41 | 0.27 | -8.49   |
| 687353 | mitoxantrone | 0.57    | 0.47 | 0.21 | -11.27  |
| 688021 | mitoxantrone | 0.56    | 0.31 | 0.15 | -6.89   |
| 688022 | mitoxantrone | 0.56    | 0.32 | 0.20 | -6.30   |
| 688274 | etoposide    | 0.54    | 0.36 | 0.34 | -5.15   |
| 690266 | etoposide    | 0.58    | 0.35 | 0.30 | -9.53   |
| 690269 | etoposide    | 0.62    | 0.36 | 0.31 | -10.15  |
| 690760 | etoposide    | 0.57    | 0.35 | 0.30 | -8.73   |
| 690983 | etoposide    | 0.57    | 0.35 | 0.30 | -7.00   |
| 691244 | amsacrine    | 0.56    | 0.43 | 0.26 | -8.77   |
| 691247 | mitoxantrone | 0.65    | 0.41 | 0.25 | -11.74  |
| 691249 | mitoxantrone | 0.64    | 0.42 | 0.26 | -12.00  |
| 691251 | amsacrine    | 0.61    | 0.40 | 0.29 | -12.20  |
| 691277 | etoposide    | 0.52    | 0.34 | 0.23 | -10.09  |
| 691656 | mitoxantrone | 0.56    | 0.40 | 0.25 | -12.12  |
| 692228 | etoposide    | 0.71    | 0.31 | 0.32 | -14.27  |
| 692736 | mitoxantrone | 0.57    | 0.37 | 0.28 | -9.68   |
| 693167 | amsacrine    | 0.54    | 0.35 | 0.16 | -8.11   |
| 693169 | etoposide    | 0.57    | 0.26 | 0.26 | -10.45  |
| 693325 | amsacrine    | 0.60    | 0.36 | 0.06 | -5.46   |
| 693335 | amsacrine    | 0.57    | 0.40 | 0.17 | -6.88   |
| 693539 | etoposide    | 0.52    | 0.38 | 0.33 | -7.72   |
| 693543 | mitoxantrone | 0.57    | 0.48 | 0.23 | -12.99  |
| 693546 | etoposide    | 0.53    | 0.44 | 0.30 | -9.28   |
| 693563 | amsacrine    | 0.58    | 0.31 | 0.26 | -9.25   |
| 693858 | amsacrine    | 0.59    | 0.40 | 0.20 | -9.06   |
| 694456 | mitoxantrone | 0.54    | 0.34 | 0.26 | -10.17  |
| 694501 | mitoxantrone | 0.61    | 0.30 | 0.30 | -7.65   |
| 695590 | mitoxantrone | 0.56    | 0.05 | 0.30 | -11.22  |
| 695804 | etoposide    | 0.54    | 0.34 | 0.22 | -9.17   |
| 695936 | etoposide    | 0.56    | 0.33 | 0.25 | -13.53  |
| 696125 | amsacrine    | 0.62    | 0.39 | 0.27 | -9.10   |
| 697535 | amsacrine    | 0.58    | 0.35 | 0.25 | -9.81   |
| 697653 | amsacrine    | 0.55    | 0.41 | 0.22 | -8.18   |
| 697685 | mitoxantrone | 0.54    | 0.31 | 0.12 | -8.61   |
| 697686 | etoposide    | 0.71    | 0.28 | 0.25 | -7.63   |
| 697726 | mitoxantrone | 0.53    | 0.37 | 0.15 | -7.89   |
| 698104 | amsacrine    | 0.55    | 0.42 | 0.24 | -10.94  |
| 699087 | etoposide    | 0.54    | 0.40 | 0.31 | -9.48   |
| 699150 | mitoxantrone | 0.57    | 0.43 | 0.27 | -11.06  |
| 699724 | mitoxantrone | 0.55    | 0.48 | 0.23 | -10.86  |
| 701022 | etoposide    | 0.58    | 0.34 | 0.26 | -8.89   |
| 701029 | etoposide    | 0.57    | 0.39 | 0.18 | -10.30  |
| 701599 | mitoxantrone | 0.54    | 0.29 | 0.19 | -8.65   |
| 701616 | ametrantrone | 0.65    | 0.46 | 0.23 | -11.20  |
| 701660 | etoposide    | 0.60    | 0.35 | 0.27 | -8.38   |
| 701743 | mitoxantrone | 0.58    | 0.05 | 0.27 | -10.64  |
| 701745 | ametrantrone | 0.56    | 0.39 | 0.24 | -11.63  |
| 701747 | etoposide    | 0.64    | 0.36 | 0.26 | -11.33  |
| 701973 | mitoxantrone | 0.68    | 0.33 | 0.20 | -12.81  |
| 702045 | etoposide    | 0.54    | 0.33 | 0.25 | -8.71   |
| 702047 | etoposide    | 0.55    | 0.37 | 0.17 | -8.13   |
| 703104 | amsacrine    | 0.61    | 0.41 | 0.21 | -7.54   |
| 703327 | etoposide    | 0.61    | 0.37 | 0.19 | -11.59  |
| 703445 | etoposide    | 0.53    | 0.37 | 0.23 | -9.81   |
| 703874 | etoposide    | 0.57    | 0.34 | 0.24 | -7.79   |
| 704533 | mitoxantrone | 0.54    | 0.33 | 0.18 | -8.02   |

Continued on next page

| NSC    | lead         | BiolAct | ROCS | CFP  | docking |
|--------|--------------|---------|------|------|---------|
| 706000 | ametantrone  | 0.59    | 0.29 | 0.22 | -12.61  |
| 706003 | mitoxantrone | 0.53    | 0.28 | 0.22 | -12.51  |
| 706737 | etoposide    | 0.54    | 0.30 | 0.34 | -7.89   |
| 706743 | mitoxantrone | 0.54    | 0.48 | 0.33 | -12.92  |
| 706744 | amsacrine    | 0.74    | 0.40 | 0.24 | -12.92  |
| 707059 | etoposide    | 0.56    | 0.37 | 0.25 | -7.91   |
| 707068 | etoposide    | 0.54    | 0.36 | 0.21 | -5.61   |
| 707696 | etoposide    | 0.53    | 0.35 | 0.31 | -8.61   |
| 708061 | etoposide    | 0.57    | 0.20 | 0.12 | -6.96   |
| 708411 | etoposide    | 0.52    | 0.31 | 0.20 | -6.63   |
| 708417 | amsacrine    | 0.53    | 0.31 | 0.20 | -7.52   |
| 708446 | etoposide    | 0.57    | 0.35 | 0.26 | -8.74   |
| 708447 | mitoxantrone | 0.57    | 0.18 | 0.20 | -9.99   |
| 709317 | etoposide    | 0.68    | 0.44 | 0.34 | -7.33   |
| 709358 | mitoxantrone | 0.54    | 0.30 | 0.29 | -9.52   |
| 710112 | etoposide    | 0.54    | 0.33 | 0.29 | -10.12  |
| 710403 | etoposide    | 0.60    | 0.32 | 0.31 | -8.77   |
| 710525 | etoposide    | 0.60    | 0.34 | 0.26 | -8.60   |
| 710551 | ametantrone  | 0.59    | 0.34 | 0.24 | -13.52  |
| 710578 | etoposide    | 0.55    | 0.31 | 0.27 | -8.22   |
| 710770 | etoposide    | 0.62    | 0.35 | 0.28 | -8.27   |
| 710861 | etoposide    | 0.57    | 0.31 | 0.19 | -8.68   |
| 711312 | etoposide    | 0.54    | 0.26 | 0.21 | -7.95   |
| 711693 | ametantrone  | 0.53    | 0.26 | 0.28 | -11.73  |
| 711694 | ametantrone  | 0.56    | 0.26 | 0.28 | -12.00  |
| 711695 | mitoxantrone | 0.54    | 0.29 | 0.32 | -12.23  |
| 711696 | ametantrone  | 0.65    | 0.24 | 0.28 | -12.31  |
| 711946 | mitoxantrone | 0.58    | 0.27 | 0.32 | -12.63  |
| 712583 | mitoxantrone | 0.62    | 0.18 | 0.03 | -5.46   |
| 712741 | amsacrine    | 0.53    | 0.45 | 0.25 | -9.58   |
| 713309 | etoposide    | 0.67    | 0.41 | 0.31 | -9.02   |
| 713649 | etoposide    | 0.66    | 0.34 | 0.27 | -8.18   |
| 713663 | etoposide    | 0.57    | 0.34 | 0.33 | -7.56   |
| 713672 | mitoxantrone | 0.55    | 0.32 | 0.26 | -10.00  |
| 715974 | etoposide    | 0.61    | 0.31 | 0.16 | -7.93   |
| 716095 | etoposide    | 0.53    | 0.36 | 0.28 | -7.50   |
| 718163 | etoposide    | 0.54    | 0.39 | 0.21 | -7.78   |
| 718303 | etoposide    | 0.54    | 0.32 | 0.30 | -8.52   |
| 718630 | mitoxantrone | 0.68    | 0.37 | 0.26 | -7.62   |
| 718631 | etoposide    | 0.69    | 0.33 | 0.24 | -7.91   |
| 718810 | etoposide    | 0.60    | 0.30 | 0.18 | -6.82   |
| 720538 | mitoxantrone | 0.59    | 0.30 | 0.20 | -9.00   |
| 720555 | etoposide    | 0.53    | 0.37 | 0.22 | -10.31  |
| 720597 | etoposide    | 0.56    | 0.32 | 0.17 | -8.93   |
| 720689 | ametantrone  | 0.63    | 0.37 | 0.28 | -14.43  |
| 720861 | etoposide    | 0.60    | 0.35 | 0.23 | -9.40   |
| 721385 | mitoxantrone | 0.56    | 0.34 | 0.20 | -8.53   |
| 721386 | amsacrine    | 0.58    | 0.35 | 0.18 | -9.83   |
| 721387 | mitoxantrone | 0.64    | 0.37 | 0.23 | -11.06  |
| 721514 | mitoxantrone | 0.59    | 0.39 | 0.25 | -8.87   |
| 721685 | etoposide    | 0.53    | 0.35 | 0.24 | -8.90   |
| 722900 | mitoxantrone | 0.69    | 0.40 | 0.31 | -9.62   |
| 723387 | amsacrine    | 0.74    | 0.42 | 0.24 | -11.13  |
| 723554 | etoposide    | 0.53    | 0.32 | 0.31 | -9.55   |
| 723733 | etoposide    | 0.67    | 0.28 | 0.32 | -9.58   |
| 724562 | amsacrine    | 0.53    | 0.39 | 0.24 | -11.29  |
| 724563 | mitoxantrone | 0.54    | 0.45 | 0.32 | -12.68  |
| 724995 | amsacrine    | 0.61    | 0.39 | 0.24 | -10.84  |
| 724998 | mitoxantrone | 0.59    | 0.45 | 0.32 | -10.59  |
| 725026 | amsacrine    | 0.55    | 0.38 | 0.18 | -7.06   |
| 725665 | etoposide    | 0.59    | 0.38 | 0.33 | -10.41  |
| 725666 | amsacrine    | 0.63    | 0.39 | 0.24 | -10.54  |
| 725669 | etoposide    | 0.54    | 0.31 | 0.24 | -11.58  |
| 725671 | amsacrine    | 0.66    | 0.40 | 0.21 | -11.94  |
| 725775 | amsacrine    | 0.66    | 0.40 | 0.24 | -10.96  |
| 725776 | amsacrine    | 0.53    | 0.40 | 0.24 | -11.58  |
| 725981 | etoposide    | 0.66    | 0.33 | 0.34 | -9.12   |
| 726112 | etoposide    | 0.57    | 0.39 | 0.34 | -11.32  |
| 726331 | amsacrine    | 0.54    | 0.38 | 0.25 | -11.00  |
| 726332 | amsacrine    | 0.59    | 0.43 | 0.24 | -10.22  |

Continued on next page

| NSC    | lead         | BiolAct | ROCS | CFP  | docking |
|--------|--------------|---------|------|------|---------|
| 726627 | etoposide    | 0.52    | 0.33 | 0.24 | -9.31   |
| 726764 | ametantrone  | 0.55    | 0.38 | 0.24 | -13.06  |
| 726769 | mitoxantrone | 0.64    | 0.48 | 0.29 | -11.98  |
| 726770 | amsacrine    | 0.67    | 0.40 | 0.20 | -10.48  |
| 726796 | etoposide    | 0.56    | 0.30 | 0.22 | -8.47   |
| 726863 | etoposide    | 0.59    | 0.28 | 0.15 | -6.30   |
| 726971 | amsacrine    | 0.66    | 0.40 | 0.24 | -11.12  |
| 727212 | etoposide    | 0.53    | 0.36 | 0.33 | -13.05  |
| 727354 | mitoxantrone | 0.61    | 0.32 | 0.31 | -10.63  |
| 727356 | mitoxantrone | 0.63    | 0.44 | 0.32 | -11.56  |
| 727572 | etoposide    | 0.63    | 0.36 | 0.32 | -8.06   |
| 727620 | mitoxantrone | 0.62    | 0.06 | 0.32 | -14.04  |
| 727621 | etoposide    | 0.53    | 0.38 | 0.33 | -11.37  |
| 727722 | mitoxantrone | 0.58    | 0.39 | 0.30 | -10.97  |
| 727729 | mitoxantrone | 0.70    | 0.30 | 0.28 | -9.76   |
| 728086 | etoposide    | 0.55    | 0.29 | 0.24 | -8.39   |
| 728089 | mitoxantrone | 0.69    | 0.44 | 0.33 | -12.15  |
| 728091 | mitoxantrone | 0.63    | 0.42 | 0.32 | -9.88   |
| 728134 | etoposide    | 0.66    | 0.36 | 0.26 | -8.31   |
| 728219 | etoposide    | 0.60    | 0.32 | 0.17 | -7.54   |
| 728316 | mitoxantrone | 0.76    | 0.43 | 0.32 | -10.79  |
| 728318 | mitoxantrone | 0.55    | 0.46 | 0.33 | -12.16  |
| 728457 | etoposide    | 0.60    | 0.26 | 0.22 | -8.62   |
| 728594 | etoposide    | 0.58    | 0.27 | 0.13 | -7.54   |
| 728856 | mitoxantrone | 0.54    | 0.45 | 0.28 | -13.04  |
| 728979 | amsacrine    | 0.57    | 0.40 | 0.23 | -9.37   |
| 729352 | mitoxantrone | 0.55    | 0.34 | 0.31 | -10.86  |
| 729812 | amsacrine    | 0.66    | 0.40 | 0.23 | -9.54   |
| 729813 | amsacrine    | 0.66    | 0.38 | 0.23 | -11.23  |
| 730001 | etoposide    | 0.53    | 0.32 | 0.26 | -10.15  |
| 730435 | ametantrone  | 0.54    | 0.42 | 0.24 | -12.87  |
| 731155 | mitoxantrone | 0.53    | 0.44 | 0.30 | -11.26  |
| 731981 | amsacrine    | 0.60    | 0.41 | 0.18 | -8.51   |
| 732534 | mitoxantrone | 0.55    | 0.18 | 0.21 | -4.48   |
| 732693 | etoposide    | 0.56    | 0.37 | 0.23 | -8.14   |
| 732787 | etoposide    | 0.61    | 0.36 | 0.29 | -9.12   |
| 732836 | etoposide    | 0.65    | 0.35 | 0.23 | -8.97   |
| 732851 | etoposide    | 0.52    | 0.35 | 0.25 | -8.58   |
| 733465 | etoposide    | 0.62    | 0.38 | 0.25 | -8.54   |
| 733654 | amsacrine    | 0.70    | 0.40 | 0.23 | -9.86   |
| 733883 | mitoxantrone | 0.56    | 0.39 | 0.32 | -9.70   |
| 734294 | amsacrine    | 0.64    | 0.41 | 0.20 | -9.39   |
| 734296 | etoposide    | 0.65    | 0.37 | 0.32 | -9.12   |
| 734430 | amsacrine    | 0.58    | 0.34 | 0.17 | -10.29  |
| 734561 | etoposide    | 0.53    | 0.34 | 0.29 | -10.91  |
| 734562 | etoposide    | 0.66    | 0.34 | 0.29 | -11.06  |
| 734799 | amsacrine    | 0.58    | 0.41 | 0.21 | -9.74   |
| 735004 | etoposide    | 0.55    | 0.27 | 0.10 | -8.31   |
| 735036 | amsacrine    | 0.72    | 0.40 | 0.24 | -12.35  |
| 735037 | mitoxantrone | 0.71    | 0.42 | 0.32 | -10.00  |
| 735356 | etoposide    | 0.56    | 0.42 | 0.22 | -8.28   |
| 735404 | etoposide    | 0.56    | 0.29 | 0.22 | -9.60   |
| 735493 | amsacrine    | 0.61    | 0.43 | 0.25 | -11.53  |
| 735798 | ametantrone  | 0.58    | 0.26 | 0.24 | -12.27  |
| 735799 | etoposide    | 0.57    | 0.31 | 0.34 | -10.47  |
| 736101 | etoposide    | 0.55    | 0.37 | 0.24 | -9.75   |
| 736116 | mitoxantrone | 0.55    | 0.43 | 0.31 | -11.46  |
| 736198 | mitoxantrone | 0.67    | 0.41 | 0.29 | -9.50   |
| 736200 | mitoxantrone | 0.68    | 0.41 | 0.29 | -9.67   |
| 736201 | mitoxantrone | 0.60    | 0.43 | 0.29 | -9.77   |
| 736202 | mitoxantrone | 0.64    | 0.42 | 0.29 | -9.09   |
| 736268 | etoposide    | 0.53    | 0.33 | 0.30 | -7.46   |
| 736394 | amsacrine    | 0.64    | 0.41 | 0.21 | -11.68  |
| 736493 | etoposide    | 0.58    | 0.34 | 0.27 | -10.72  |
| 736611 | mitoxantrone | 0.63    | 0.49 | 0.19 | -12.61  |
| 736624 | mitoxantrone | 0.61    | 0.43 | 0.29 | -9.66   |
| 736681 | etoposide    | 0.63    | 0.37 | 0.29 | -9.89   |
| 736829 | mitoxantrone | 0.55    | 0.48 | 0.29 | -11.77  |
| 736913 | etoposide    | 0.61    | 0.36 | 0.29 | -9.91   |
| 736916 | etoposide    | 0.65    | 0.36 | 0.29 | -9.62   |

Continued on next page

| NSC    | lead         | BiolAct | ROCS | CFP  | docking |
|--------|--------------|---------|------|------|---------|
| 736988 | amsacrine    | 0.65    | 0.43 | 0.25 | -11.47  |
| 737318 | mitoxantrone | 0.56    | 0.41 | 0.32 | -10.13  |
| 737344 | amsacrine    | 0.65    | 0.37 | 0.24 | -11.28  |
| 737518 | amsacrine    | 0.70    | 0.40 | 0.24 | -10.47  |
| 737672 | mitoxantrone | 0.58    | 0.43 | 0.34 | -8.86   |
| 737707 | amsacrine    | 0.54    | 0.41 | 0.20 | -7.78   |
| 737737 | mitoxantrone | 0.65    | 0.36 | 0.24 | -8.78   |
| 740051 | etoposide    | 0.57    | 0.41 | 0.31 | -9.06   |
| 740121 | etoposide    | 0.58    | 0.30 | 0.21 | -10.44  |
| 740268 | mitoxantrone | 0.64    | 0.41 | 0.33 | -9.35   |
| 740504 | etoposide    | 0.56    | 0.36 | 0.27 | -13.06  |
| 740520 | mitoxantrone | 0.63    | 0.40 | 0.30 | -9.98   |
| 740524 | amsacrine    | 0.60    | 0.41 | 0.24 | -10.16  |
| 740564 | mitoxantrone | 0.58    | 0.44 | 0.30 | -11.47  |
| 740609 | etoposide    | 0.52    | 0.34 | 0.28 | -11.36  |
| 740643 | amsacrine    | 0.63    | 0.42 | 0.24 | -9.81   |
| 740644 | amsacrine    | 0.65    | 0.40 | 0.24 | -9.85   |
| 740645 | amsacrine    | 0.66    | 0.40 | 0.24 | -11.14  |
| 740648 | amsacrine    | 0.67    | 0.46 | 0.25 | -12.30  |
| 740974 | mitoxantrone | 0.60    | 0.43 | 0.30 | -9.88   |
| 740975 | mitoxantrone | 0.59    | 0.41 | 0.29 | -9.84   |
| 741106 | amsacrine    | 0.60    | 0.43 | 0.20 | -11.26  |
| 741107 | amsacrine    | 0.57    | 0.40 | 0.22 | -11.31  |
| 741459 | mitoxantrone | 0.76    | 0.30 | 0.28 | -9.12   |
| 741695 | etoposide    | 0.59    | 0.25 | 0.22 | -8.64   |
| 742417 | etoposide    | 0.57    | 0.30 | 0.27 | -8.19   |
| 742801 | etoposide    | 0.58    | 0.38 | 0.23 | -7.78   |
| 743864 | mitoxantrone | 0.54    | 0.33 | 0.28 | -8.88   |
| 744330 | mitoxantrone | 0.66    | 0.26 | 0.28 | -8.80   |
| 744622 | amsacrine    | 0.53    | 0.27 | 0.17 | -9.49   |
| 746351 | amsacrine    | 0.58    | 0.41 | 0.18 | -7.28   |
| 747292 | amsacrine    | 0.53    | 0.34 | 0.21 | -8.17   |
| 751393 | etoposide    | 0.61    | 0.37 | 0.27 | -7.71   |

Table S7: Docking scores of DUDE-E decoys.

| Title     | docking_score |
|-----------|---------------|
| C65469915 | -12.20        |
| C00636200 | -11.64        |
| C02582595 | -11.14        |
| C14992360 | -11.09        |
| C57773689 | -11.05        |
| C20132031 | -10.84        |
| C15721960 | -10.83        |
| C76971785 | -10.74        |
| C09239600 | -10.67        |
| C97334294 | -10.63        |
| C71788398 | -10.57        |
| C98178696 | -10.49        |
| C39500252 | -10.45        |
| C05980708 | -10.43        |
| C38517546 | -10.41        |
| C19229474 | -10.40        |
| C02348787 | -10.36        |
| C63698417 | -10.33        |
| C63855242 | -10.23        |
| C15722286 | -10.23        |
| C33697219 | -10.23        |
| C08076202 | -10.20        |
| C64158213 | -10.17        |
| C02437529 | -10.16        |
| C38999931 | -10.16        |
| C13539040 | -10.15        |
| C64067023 | -10.15        |
| C34250406 | -10.13        |
| C65405674 | -10.12        |
| C40801473 | -10.07        |

Continued on next page

| Title     | docking_score |
|-----------|---------------|
| C39560948 | -10.05        |
| C77357347 | -10.02        |
| C20116877 | -9.99         |
| C40570282 | -9.99         |
| C65407120 | -9.97         |
| C00636047 | -9.95         |
| C13539043 | -9.93         |
| C38486049 | -9.91         |
| C38517641 | -9.90         |
| C39015840 | -9.89         |
| C39015836 | -9.88         |
| C72434813 | -9.86         |
| C26896594 | -9.80         |
| C33450962 | -9.79         |
| C43773452 | -9.79         |
| C25585272 | -9.79         |
| C72477679 | -9.77         |
| C06510920 | -9.76         |
| C08740221 | -9.74         |
| C39953335 | -9.74         |
| C38546965 | -9.73         |
| C14472334 | -9.71         |
| C34001737 | -9.70         |
| C03840128 | -9.68         |
| C01698989 | -9.65         |
| C72380005 | -9.65         |
| C95869711 | -9.63         |
| C01062118 | -9.57         |
| C96336260 | -9.55         |
| C14086129 | -9.52         |
| C21146606 | -9.52         |
| C14744245 | -9.52         |
| C43773453 | -9.50         |
| C25605891 | -9.45         |
| C09490572 | -9.42         |
| C73374099 | -9.42         |
| C06614498 | -9.40         |
| C19741840 | -9.38         |
| C39932294 | -9.38         |
| C93791735 | -9.37         |
| C39946867 | -9.37         |
| C49061297 | -9.37         |
| C15066260 | -9.36         |
| C44358916 | -9.34         |
| C63818501 | -9.29         |
| C20805442 | -9.29         |
| C22576466 | -9.28         |
| C64683770 | -9.27         |
| C57761945 | -9.27         |
| C20463116 | -9.22         |
| C20436792 | -9.22         |
| C97945339 | -9.20         |
| C67616676 | -9.18         |
| C89943041 | -9.18         |
| C34914020 | -9.18         |
| C42182418 | -9.14         |
| C65374419 | -9.14         |
| C89943040 | -9.14         |
| C20915747 | -9.12         |
| C92455417 | -9.12         |
| C00623661 | -9.12         |
| C13555666 | -9.12         |
| C06501754 | -9.11         |
| C21866363 | -9.10         |
| C04066639 | -9.09         |
| C63503255 | -9.09         |
| C12504524 | -9.08         |
| C05192427 | -9.08         |
| C20836850 | -9.05         |
| C40756782 | -9.05         |

Continued on next page



| Title     | docking_score |
|-----------|---------------|
| C40801537 | -9.00         |
| C04221602 | -9.00         |
| C14476043 | -8.95         |
| C01355376 | -8.95         |
| C97405180 | -8.94         |
| C40701948 | -8.94         |
| C58379195 | -8.93         |
| C49421241 | -8.91         |
| C40701949 | -8.90         |
| C86066393 | -8.89         |
| C88943634 | -8.88         |
| C08613448 | -8.88         |
| C67634894 | -8.88         |
| C02429161 | -8.87         |
| C72099787 | -8.84         |
| C18158775 | -8.82         |
| C09003806 | -8.82         |
| C39952927 | -8.80         |
| C88757913 | -8.79         |
| C03009215 | -8.77         |
| C15772708 | -8.75         |
| C01325000 | -8.73         |
| C12134269 | -8.73         |
| C06161920 | -8.71         |
| C08636781 | -8.68         |
| C20922520 | -8.68         |
| C04827638 | -8.67         |
| C09242812 | -8.66         |
| C20922598 | -8.64         |
| C20550368 | -8.61         |
| C08643875 | -8.60         |
| C22839320 | -8.57         |
| C39007764 | -8.56         |
| C14276867 | -8.56         |
| C97527879 | -8.56         |
| C37866073 | -8.56         |
| C11661801 | -8.56         |
| C20921837 | -8.55         |
| C22056694 | -8.53         |
| C02474720 | -8.52         |
| C08152480 | -8.50         |
| C35981790 | -8.49         |
| C02584814 | -8.49         |
| C15962384 | -8.48         |
| C97648044 | -8.47         |
| C63426950 | -8.44         |
| C50440563 | -8.44         |
| C05414593 | -8.41         |
| C63920236 | -8.41         |
| C03464393 | -8.41         |
| C12859983 | -8.40         |
| C54804688 | -8.39         |
| C89054088 | -8.38         |
| C09750214 | -8.37         |
| C89943835 | -8.37         |
| C16756749 | -8.37         |
| C04502846 | -8.36         |
| C39012857 | -8.35         |
| C97648048 | -8.34         |
| C14551099 | -8.33         |
| C08905668 | -8.32         |
| C06074140 | -8.29         |
| C03583996 | -8.28         |
| C85425716 | -8.26         |
| C04388372 | -8.23         |
| C19827453 | -8.23         |
| C09350731 | -8.17         |
| C41021336 | -8.16         |
| C27420460 | -8.16         |
| C16210468 | -8.14         |

Continued on next page

| Title     | docking_score |
|-----------|---------------|
| C31157904 | -8.14         |
| C07742097 | -8.11         |
| C63752986 | -8.08         |
| C13608616 | -8.05         |
| C36127331 | -8.03         |
| C44443373 | -8.00         |
| C06550815 | -7.98         |
| C97337215 | -7.95         |
| C08763931 | -7.94         |
| C14674332 | -7.88         |
| C27570104 | -7.87         |
| C04221674 | -7.86         |
| C10248529 | -7.84         |
| C40679521 | -7.83         |
| C01754852 | -7.83         |
| C20566341 | -7.83         |
| C35555986 | -7.83         |
| C13608697 | -7.80         |
| C20566737 | -7.80         |
| C40734699 | -7.77         |
| C01037587 | -7.76         |
| C08740529 | -7.75         |
| C88464716 | -7.74         |
| C40686541 | -7.71         |
| C03807172 | -7.68         |
| C03043911 | -7.66         |
| C59612440 | -7.65         |
| C92477162 | -7.61         |
| C09325300 | -7.60         |
| C23379430 | -7.59         |
| C36006179 | -7.59         |
| C70671778 | -7.59         |
| C44137709 | -7.56         |
| C01511355 | -7.55         |
| C16283587 | -7.55         |
| C11883249 | -7.51         |
| C19940784 | -7.50         |
| C12930324 | -7.46         |
| C59147401 | -7.46         |
| C18098320 | -7.43         |
| C13513671 | -7.40         |
| C96147944 | -7.38         |
| C20922797 | -7.38         |
| C21819441 | -7.38         |
| C16430580 | -7.36         |
| C05362734 | -7.34         |
| C20407810 | -7.33         |
| C71789697 | -7.32         |
| C12516987 | -7.31         |
| C64684229 | -7.30         |
| C14609098 | -7.30         |
| C02751023 | -7.29         |
| C06560016 | -7.25         |
| C58441612 | -7.25         |
| C96395303 | -7.21         |
| C64948688 | -7.09         |
| C01452524 | -7.08         |
| C08116979 | -6.98         |
| C33257185 | -6.89         |
| C05819214 | -6.85         |
| C36694022 | -6.76         |
| C32996316 | -6.75         |
| C09366196 | -6.68         |
| C01820789 | -6.66         |
| C64684771 | -6.66         |
| C07260781 | -6.61         |
| C96333100 | -6.52         |
| C36693907 | -6.51         |
| C09824460 | -6.51         |
| C04742125 | -6.22         |

Continued on next page

| Title     | docking_score |
|-----------|---------------|
| C98046891 | -5.98         |
| C29559740 | -5.43         |
| C03874159 | -5.23         |
| C16923900 | -5.07         |
| C67911450 | -3.71         |
